# Supplementary material for: Bacteria as paleoenvironmental proxies: the study of a cave Pleistocene profile
Source: Copernicus journal article supplement (doi:10.5194/egusphere-2024-2973), 2024-10-08
Supplement: Supplementary file [file egusphere-2024-2973-CC2-supplement.pdf]

# Bacteria as paleoenvironmental proxies: the study of a cave Pleistocene profile

Cătălina Haidău<sup>1§</sup>, Ionuț Cornel Mirea<sup>1§</sup>, Silviu Constantin<sup>1,2</sup>, Oana Teodora Moldovan<sup>2,3\*</sup>

<sup>1</sup>Emil Racovita Institute of Speleology, București 050711, Romania

5 <sup>2</sup>Centro Nacional de Investigación sobre la Evolución Humana, Burgos 09002, Spain

<sup>3</sup>Emil Racovita Institute of Speleology, Cluj-Napoca Department, Cluj-Napoca 400006, Romania

§These authors had an equal contribution.

*Correspondence to:* Cătălina Haidău (haidau.catalina@gmail.com) and Oana T. Moldovan (oanamol35@gmail.com)

10 **Abstract.** Caves are well-known archives that preserve valuable information about the past, relevant for reconstructing past climates and environments. We sampled sediments from a 480 cm deep profile. 16S rRNA gene-based metabarcoding analyses were undertaken that complemented lithological logging, sedimentology, and Optically Stimulated Luminescence (OSL) dating. These analyses revealed different sedimentation conditions along the profile with various water inputs. The OSL age of the sediments places the profile between  $74.7 \pm 12.3$  to  $56 \pm 8$  ka (base to top). However, the more recent LGM – Last  
15 Glacial Maximum paleofloods might have occurred in the upper and lower passages of the cave. Bacterial compositions changed with depth, from soil bacteria (present in the upper part of the sediment profile) to thermophilic/sulfurous bacteria (abundant in the deeper samples of the profile). Considering the thermophilic bacteria, we could only assume their origin from a surface of hot sulfurous, old thermal springs, or sapropel sediments.

## 1 Introduction

20 Caves are known archives that preserve valuable information about climate in deposits and are relevant for the reconstruction of past climate and past environments (e.g., White, 2007; Nejman et al., 2018; Constantin et al., 2021; Bernal et al., 2023; Campaña et al., 2023). Caves are also known as systems with no primary production due to the lack of plants, low nutrient input from the surface, and low in situ production (Howarth and Moldovan, 2018; Kosznik-Kwaśnicka et al., 2022). That also means that the number of biological proxies (fossil bones, fossil invertebrates, pollen) in caves to be used in  
25 paleoenvironmental and paleoclimatic studies is relatively low, and they might even be absent (Moldovan et al., 2011, 2016). Therefore, studying bacteria in cave deposits can open an avenue for paleoenvironmental research and fill some gaps related to presumed past processes in the absence of reliable proxies.

Bacteria are crucial in oligotrophic environments such as caves, as they can be primary producers and participate actively in biogeochemical cycles (Talà et al., 2021; Zada et al., 2021; Lange-Enyedi et al., 2022). Microbes regulate essential ecosystem

30 processes such as the biogeochemical cycling of micro- and macronutrients (Uroz et al., 2009; Pester et al., 2012) or are implicated in the formation (Yarwood et al., 2018; Domeignoz-Horta et al., 2021) or decomposition of organic matter (Krishna and Mohan, 2017; Prescott and Vesterdal, 2021). They can adapt and survive depending on abiotic and biotic factors (litter inputs, moisture, temperature; Castro et al., 2010; Wani et al., 2022).

Bacterial community and structure can change over time due to modifications in the physicochemical components of an ecosystem, leading to the development of biogeographical patterns (Malard et al., 2019; Thomas et al., 2019; Bay et al., 2020; Ji et al., 2020). These patterns serve as indicators of past environmental changes. For example, the structure of bacterial communities present at deposition becomes preserved in sediment layers formed under changing environmental conditions (Frindte et al., 2020; Semenov et al., 2020; Barbato et al., 2022). Thus, such environmental conditions could be traced by reconstructing bacterial community structures from different sediment layers (Thomas et al., 2019; Frindte et al., 2020; Semenov et al., 2020; Barbato et al., 2022).

Microbial paleoenvironmental studies on soil and lake/sea sediments are more common than in caves, highlighting the importance of their diversity as an indicator of ecosystem function and environmental conditions for reconstructing the past. For instance, Xu et al. (2022) found microbial communities in lacustrine sediments that provided valuable insights into past environmental and climate changes. The distinct vertical trends in microbial community structures, influenced by abrupt environmental shifts, suggest that these communities responded dynamically to climatic events, such as aridification and cooling, around 8 million years ago. These shifts are also consistent with previous pollen evidence, indicating a transition from forest to steppe vegetation correlated with a significant uplift of the Tibetan Plateau. More et al. (2019) examined the microbial communities in the Black Sea sediments in response to substantial paleoenvironmental changes, mainly focusing on the transition around 5.2 ka. This study highlights bacterial composition changes driven by increased salinity. The research also underlines key microbial metabolic processes, shift from methane metabolism before 5.2 ka to enhanced nitrogen and sulfur metabolisms. These changes correspond with the establishment of modern conditions in the Black Sea.

A study on paleosols (Frindte et al., 2020) that analyzed environmental DNA from different horizons within an arid paleosequence revealed key changes in microbial communities over time. The findings indicate bacterial abundance, diversity, and community composition decline with increasing soil depth and age. However, deviations from this trend were observed in paleosol horizons with higher microbial diversity and abundance, suggesting that advanced soil formation processes may have preserved more diverse microbial communities. The study also identified specific microbial taxa associated with certain soil horizons, proving that some microbial communities from ancient environments remain detectable despite burial.

Regarding the caves, most studies on paleoenvironment focused on proxies such as stable isotopes (Waltgenbach et al., 2021; Weber et al., 2021), fossil bones (Berto et al., 2021; Mirea et al., 2021; Cruz et al., 2023), fossil invertebrates (Moldovan et al., 2011, 2016; Buttler and Wilson, 2018; Romano et al., 2024; Osipova et al., 2022), or pollen (Prieto et al., 2021; Minckley et al., 2023).

Studies on cave microbes were performed regarding their diversity (Zhu et al., 2019; Dong et al., 2020; Dominguez-Moñino et al., 2021), associations (Dattagupta et al., 2009; Ma et al., 2021; Zhao et al., 2024), but little attention was given to their

potential as paleoclimate proxies (Epure et al., 2014, 2017; Yun et al., 2016). Furthermore, Epure et al. (2014, 2017) indicated the potential of microbes from old cave sediment deposits in paleoenvironment and paleoclimate reconstruction. Zepeda Mendoza et al. (2016) explored the microbial communities within a speleothem, indicating their potential as past biodiversity archives. Metagenomic analysis on a speleothem in a cave near the sea found microbes related to soil and marine environments. Michail et al. (2021) revealed a complex and dynamic microbial community from a stalactite core composed of bacteria from the upper-ground environment. As indicated by specific bacteria, the evidence of seasonal climate variations emphasizes environmental factors' role in shaping microbial composition over time. Overall, this research provided valuable insights into the microbial ecology of cave environments and highlights the need for further investigation into the role of microorganisms in cave deposits and paleoclimate reconstruction.

The scope of our study was to investigate the bacterial diversity from a 480 cm deep profile in Muierilor Cave, Romania, where no other biological proxy was found. This cave was studied for its evolution during the last 120 kyr. The combined OSL, AMS<sup>14</sup>C and sedimentology results, together with taphonomical analysis of the Pleistocene mammals' accumulation, indicated that most cave levels were already formed at ~120 ka with the lower levels functioning periodically as vadose cave passages where sediments from the Galbenul River were deposited (Mirea et al., 2021). The bacteria identified through the 16S rRNA gene-based metabarcoding were also compared to other proxies to help define past environments. Thermophiles and sulfur bacteria were amongst the high-abundance bacteria with depth, which raised questions about their occurrence since the cave is characterized by a temperature much lower than their growth range. The possible sources of our samples are discussed, and the results strongly support the importance of investigating bacteria in old sediments, especially in the absence of other biological proxies. When cross-correlated with other proxies, our findings indicate the deposition conditions and water sources during the Pleistocene/Holocene, bringing new insights into the regional karst evolution.

## 2 Materials and methods

### 2.1 Site description and sampling

The geological settings of the Polovragi-Cernădia area are a part of the Parâng Mountains complex, where the basement is a combination of metamorphic pre-Alpine formation and granitic bodies (Hann et al., 1986), while the sedimentary deposits are represented by a mix of Upper Paleozoic and Mesozoic limestones, conglomerates, and Cenozoic deposits (gravel, sand, and clay) (Fig 1a). The limestones in this region belong to the Oslea-Polovragi formation, made of white-grey and white limestones that can reach a thickness of 150-250 m, covering a surface of approximately 2 km<sup>2</sup> (Bandrabur and Bandrabur, 2010; Mirea et al., 2021). Moreover, the Polovragi-Cernădia karst area (where Muierilor Cave is carved) spans approximately ~2.5 km<sup>2</sup>, with the limestone bar's width ranging from 2 km to 0.8 km and its thickness between 150 m and 250 m. Given this isolation of the limestone within surrounding magmatic and metamorphic rocks, it is unlikely that bacteria were transported over long distances (no more than 2 km) via the epikarst network.

95 Muierilor Cave (45°11'31.78"N and 23°45'14.07"E)1) is located at ~ 645 m a.s.l. in Baia de Fier, south-western Romania, being one of the most-visited show caves in the country due to its archaeological, paleontological, and mineralogical features (Fig. 1b). It is developed in Upper Jurassic-Lower Cretaceous limestone on the right side of the Galbenul Gorge. The cave system is carved on four distinct levels, with a total length of more than 8000 m, and its cave levels are extended on an elevation range of ~80 m. The significant parts of the cave include the Scientific Reserve (Level 1) and the Touristic Passage (Level 2)  
100 (Mirea et al., 2021). The fossil record in Muierilor Cave is rich, and the long history of excavations (1950-2021) of the upper and lower levels of the cave revealed numerous species. The most significant fossil accumulation is in the Urşilor Passage because of primary and secondary thanatocoenosis (Mirea et al., 2021). The highest density of the fossil remains (~ 200 bones/m<sup>2</sup>) is reported near the PMP1 excavation site and decreases **to no fossils** towards the PMP2 test pit (Fig. 1d.).  
For this study, we sampled in PMP2 (Figs. 1d and 2), a test pit of 1.5/1.5 m and with a depth of 480 cm, located at the northern  
105 end of the Urşilor Passage near the **restricted** entrance (**probably an ancient siphon**) towards the Hades Passage (Mirea et al., 2021). **In this part of the cave, there is no evidence of present or former percolation, only an important accumulation of finer sediments than in PMP1, before the morphologically restricted entrance towards Hades Passage.**



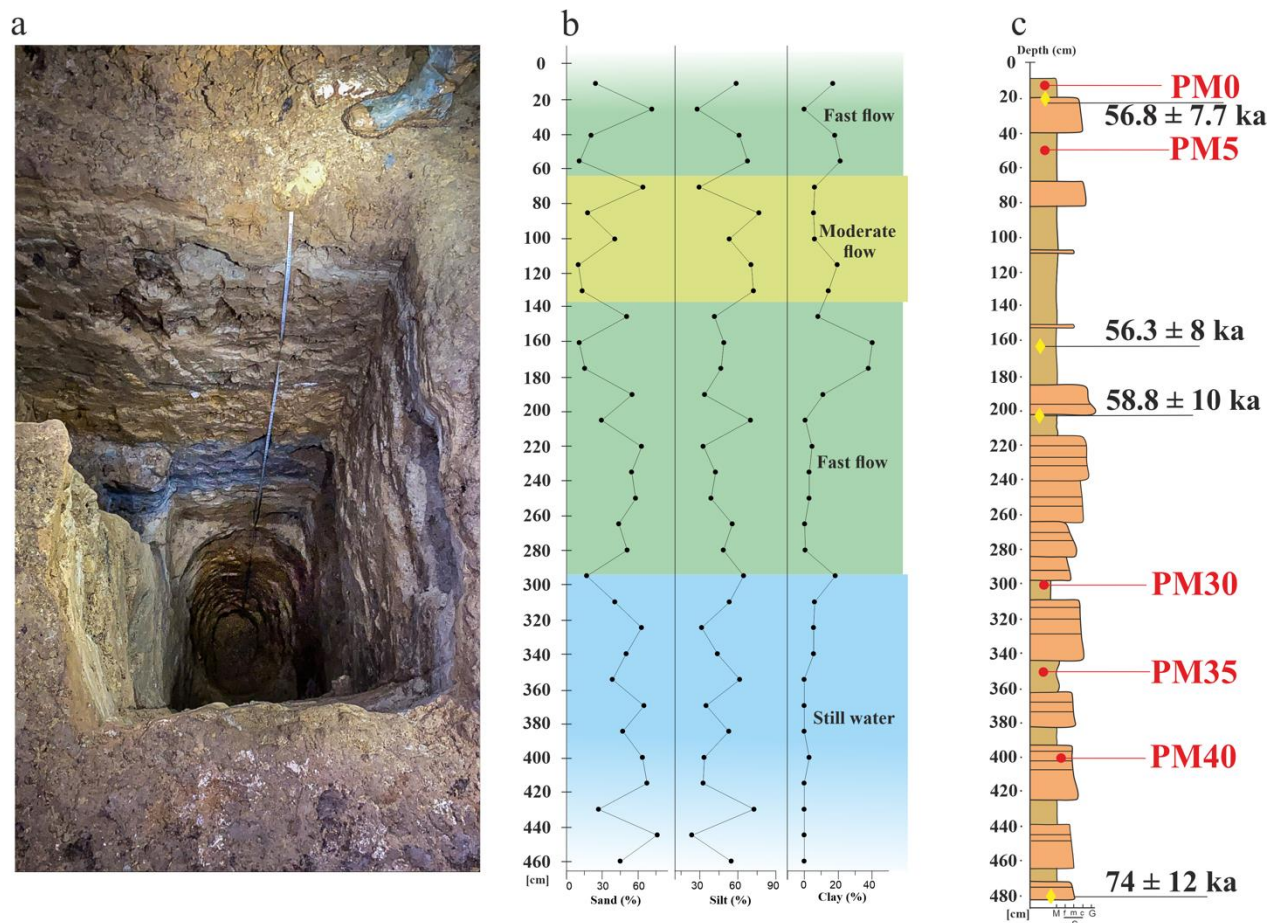

**Figure 2: The analyzed deposits in Muierilor Cave: a. Photo of the PMP2 section in Urșilor Passage seen from above; b. The grain size measurements (modified after Mirea, 2020 and Mirea et al., 2021); c. The position of the samples (red) and the OSL ages (yellow) on the profile (modified after Mirea, 2020 and Mirea et al., 2021).**

120

## 2.2 Sediment analysis and chronological framework

For the PMP2 profile, on-site lithological logging and analyses of sediments' grain size were undertaken by Mirea et al. (2021). Optically Stimulated Luminescence (OSL) was used to constrain the sediment input and the deposition events that occurred in the cave passages.

125 The PMP2 profile was excavated for sedimentology studies. It has a complex structure with sand, silts, and clay levels. It is located at the limit between the Urșilor and Hades passages (Fig. 1). Between 150 and 300 cm in depth; the sediments are alternating between sand and silt (Fig. 2), while higher amounts of clay appear in the upper sector, indicating a change in the source area. In contrast, in the topmost part, alternating clay and sands suggest the persistence of high-energy streams. The anisotropy of magnetic susceptibility (AMS) data (Fig. 2) showed that between 420 and 300 cm in depth, the sediments were

130 deposited from still water (Tauxe et al., 1998), most likely due to a small lateral lake formed on the main cave stream. The following 150 cm (between 300 and 150 cm) are characterized by deposition under a high energy current flow, a moderate flow current deposited the segment between 150 to 50 cm, and the last 50 cm show a deposition in high, moderate currents (i.e. no particle entrainment). We, therefore, assume that the general flow direction was NE-SW with possible “apparent reversals”, such as those due to vortex-type flows generated by cave wall topography.

135 The base of the sediments in the PMP2 profile has an OSL age of  $74.7 \pm 12.3$  ka (Fig. 1d), while the upper 2 m of the section has a significantly younger OSL age of around 58 ka.

Mirea et al. (2021) thoroughly studied the sediment deposition processes in Muierilor Cave, which highlighted some paleoflood events that had occurred during several time intervals, coinciding with warmer and wetter conditions that led to increased water input into the cave passages.

### 140 2.3 Sampling for DNA, extraction, and sequencing

For the microbiome analysis, sediment samples were taken directly into sterile Falcon tubes every 50 cm in the PMP2 profile. To avoid contamination, before sampling, the first few centimetres from the sediment surface were removed with the use of a sterilized utensil, and the sediment was taken directly with a sterile Falcon tube. Sediment samples analyzed in this study were taken from the surface of the pit (PM0) and at -50 cm (PM5), -300 cm (PM30), -350 cm (PM35), and -400 cm (PM40) deep.

145 Not enough genetic material for metagenomics could be extracted for the samples at -100 and -250 cm, most likely due to the high amount of clay or other inhibitors we could not remove. Clay is known for inhibiting microorganisms (McMahon et al., 2016). The samples were transported for further laboratory analysis in an icebox and kept in the freezer at  $-60^{\circ}\text{C}$  until extraction. A quantity of 25 mg of sediment was used for DNA extraction.

We used FastPrep-24TM (MP Biomedicals) for cell disruption, and DNeasy PowerSoil (Qiagen) was used for genomic DNA extraction, according to the manufacturer’s instructions. DNA was extracted in duplicates and was quantified using SpectraMax QuickDrop (Molecular Devices). Extracted DNA was used as a template and sent for MiSeq 16S V3-V4 Metagenome Sequencing using a commercial company (Macrogen Europe). PCR of the V3-V4 hypervariable regions of the bacterial and archaeal SSU rRNA gene was performed using bacteria-specific primers 341F (5’-CCTACGGGNGGCWGCAG-3’) and 805R (5’-GACTACHVGGGTATCTAATCC-3’), according to Illumina’s 16S  
155 amplicon-based metagenomics sequencing protocol.

### 2.4 Metabarcoding analysis and tests

Metabarcoding analysis was performed by a commercial company (Macrogen Europe) as follows: samples were analyzed using CD-HIT-OTU (Li et al., 2012) and rDnaTools (Schloss et al., 2009). Merging pairs of short reads was performed with FLASH (1.2.11) (Magoč and Salzberg, 2011). It is designed to merge pairs of reads when the original DNA fragments are shorter than twice the length of reads. CD-HIT-OTU is a multi-step pipeline to generate OTU clusters for ribosomal ribonucleic acid (rRNA) tags from 454 and Illumina platforms. CD-HIT-OTU and rDNATools were used to filter out short reads and



extra-long tails; filtered reads were clustered at 100% identity using CD-HIT-DUP. Chimeras were identified and removed. Remaining representative reads from non-chimeric clusters are clustered into OTUs at 97% OTU cutoff. Forward and reverse primers were removed, and for further analysis, reads with a minimum length of 250 nt and a maximum of 301 were retained.

165 The sequencing depth varied between 79,534 and 126,869 sequences per sample, with a median of 112,595. The final dataset consisted of a total of 2,692 OTU from 9 samples.

Taxonomic assignment and diversity statistics were performed by QIIME-UCLUST using NCBI targeted loci project databases 16S RefSeq version 20211127. Representative sequences from each OTU were used to assign taxonomy from phylum to species levels.

170 The raw data were deposited in the NCBI SRA Sequence Read Archive under the BioProject: PRJNA1161469, with BioSample accessions: SAMN43780924, SAMN43780925, SAMN43780926, SAMN43780927, SAMN43780928, SAMN43780929, SAMN43780930, SAMN43780931, SAMN43780932.

Using Phyloseq (McMurdie and Holmes, 2013) in R, alpha diversity indices were calculated, and differences in community composition were evaluated. Tax\_glom function (taxonomic agglomeration; McMurdie and Holmes, 2013) was used to

175 generate counts and relative abundances at phylum, family, genus and species levels. Alpha diversity indices such as Shannon, Chao1, and Simpson's were calculated and used to express information about the composition of samples. Shannon considers the weight of each species in an ecosystem and gives a better description of its diversity (Konopiński, 2020). Simpson's diversity index estimates the probability that two randomly selected individuals will be identical in a sample. The less diversity, the greater the likelihood that two randomly chosen individuals will be the same species (Simpson 1949; Zhou et al. 2020).

180 Moreover, an abundance-based estimator of species richness, Chao1 index, was also calculated (Kim et al. 2017). **To compare the bacteria diversity in the 5 analyzed sediment samples of the PMP2 profile, we applied the Agglomerative Hierarchical Clustering (AHC) in the XLSTAT (2024.2.2. version) based on the dissimilarity matrix generated with the most 256 abundant species.**

### 3 Results

#### 185 3.1 Bacteria composition in the sedimentary profile

Only the domain *Bacteria* was kept for further analysis of microbial composition because the abundance of *Archaea* was very low (under 0.2%), with only one species (the ammonia-oxidizing *Nitrosopumilus ureiphilus*) present in PM0, PM30, PM35, and PM40. Except for PM40, the other samples provided enough material for duplicates (PM0, PM5, PM30, PM35) for which the mean abundances were used for further analysis.

190 From 2692 Bacteria OTUs, those with an abundance of over 1% were used for further analysis (see also Table A1). A total of 10 major bacterial phyla were identified in our samples (Fig. 3a), with *Proteobacteria* (22-62%) being the most abundant in all samples, followed by *Firmicutes* (PM0-20%; PM35-23%; PM40-30%), and *Actinobacteria* (PM0-10%; PM5-13%; PM30-



20%; PM40-17%). The relative abundance of *Proteobacteria* decreased with depth, while *Firmicutes* and *Actinobacteria* relative abundances increased. *Cyanobacteria* appeared in surprising relative abundance in PM35 (9%).

195

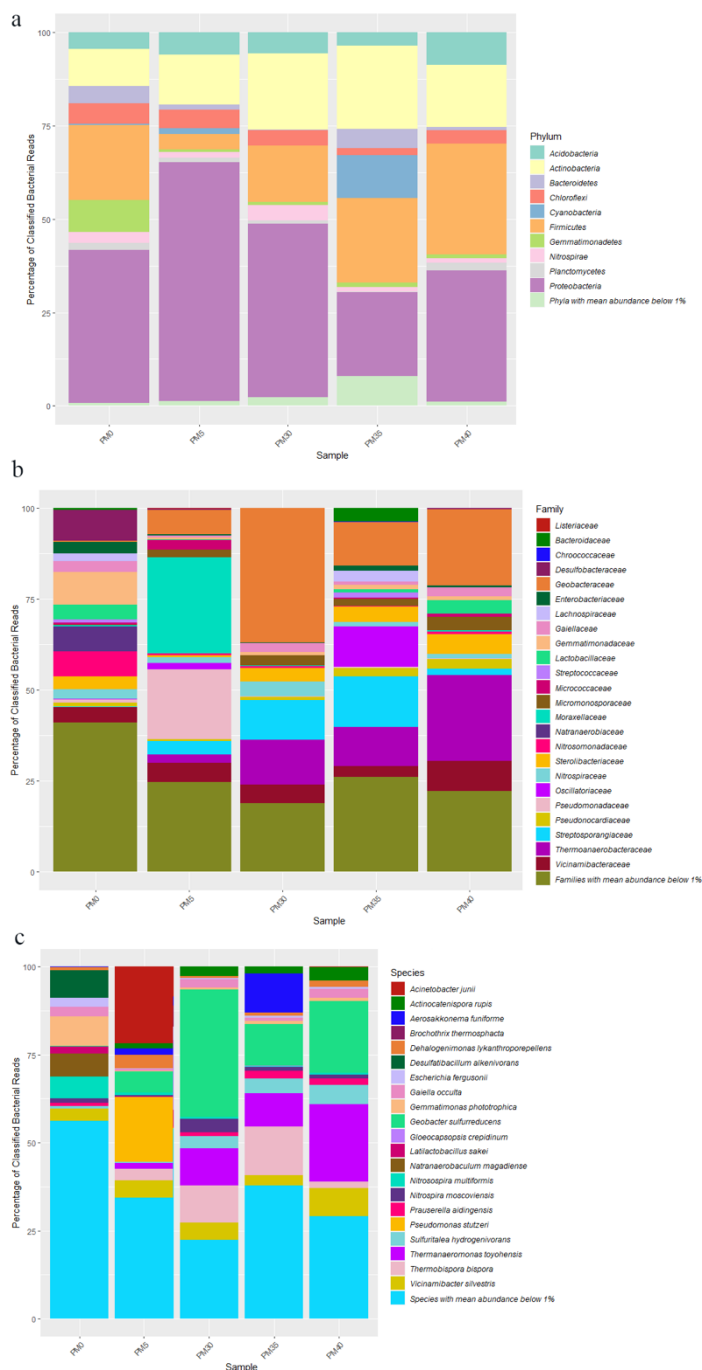

**Figure 3** The relative abundance of phyla (a), families (b), and species (c) in the analyzed sediment samples of Muierilor Cave (abundance >1%).

The family composition (Fig. 3b) differed when comparing the upper with the deeper samples. In PM0, *Gemmatimonadaceae* and *Desulfobacteraceae* (8%), and *Natranerobiaceae* (6%) were the most abundant, while in PM5 *Moraxellaceae* (26%),

*Pseudomonadaceae* (19%), and *Geobacteraceae* (6%). With deeper samples, the family relative abundances were quite similar, with *Geobacteraceae* (PM30-36%; PM35-12%; PM40-20%), *Thermoanaerobacteraceae* (PM30-12%; PM35-11%; PM40-23%) and *Sterolibacteriaceae* (PM30-3%; PM35-5%; PM40-5%) amongst the highest. *Streptosporangiaceae* (PM30-11%; PM35-14%; PM40-2%) and *Vicinamibacteraceae* (PM30-5%; PM35-3%; PM40-8%) were present in the highest abundance in the two samples. *Oscillatoriaceae* was the third highest in PM35 (11%; very low in the other samples), while *Sterolibacteriaceae* in PM40 (5%; PM30- 4%; PM35-5%).

The most abundant species (Fig. 3c) from surface sample PM0 were *Gemmatimonas phototrophica* (7%), *Desulfatibacillum alkenivorans* (7%), and *Natranaerobaculum magadiense* (6%), while in PM5 (-50 cm) *Acinetobacter junii* (21%), *Pseudomonas stutzeri* (18%), and *Geobacter sulfurreducens* (6%) where the most abundant. As in the case of family abundances, species relative abundances are similar in deeper samples, with *Geobacter sulfurreducens* (PM30-28%; PM35-10%; PM40-18%) and *Thermanaeromonas toyohensis* (PM30, PM35-8%; PM40-19%) present in all three samples with high abundances. *Thermobispora bispora* (PM30-8%; PM35-12%) was in high abundance in the first two bottom samples (-300 cm; -350 cm) while *Sulfuritalea hydrogenivorans* in the last two bottom samples (PM35-4%; PM40- 5%; -350 cm; -400 cm). Also, *Nitrospira moscoviensis* was found in high abundance in PM30 (3%; PM35, PM40-0.1%), and *Actinocatenispora rupis* in PM40 (3%; PM30, PM35-2%). *Vicinamibacter silvestris* was one of the most abundant bacteria throughout our profile (3-7%). A cyanobacterium *Aerosakkonema funiforme* in high abundance in PM35 (9%; PM0-0.1%; PM5-1%; PM30-0.04%) was absent in PM40.

The Chao1 (Table 1) indicated that species richness was relatively higher in the surface samples (PM0 and PM5) than in deeper samples (PM30, PM35, PM40). The Shannon and Simpson diversity indices showed that surface samples (PM0) had a more diverse bacterial community than deeper samples (PM5; PM30, PM35, PM40).

**Table 1 Diversity indices of sediment samples from Muierilor Cave.**

| Sample | Diversity indices |         |         |
|--------|-------------------|---------|---------|
|        | Chao1             | Shannon | Simpson |
| PM0    | 342.49            | 4.57    | 0.97    |
| PM5    | 395.15            | 3.26    | 0.82    |
| PM30   | 266.04            | 3.60    | 0.92    |
| PM35   | 231.71            | 3.66    | 0.93    |
| PM40   | 211.5             | 3.73    | 0.92    |

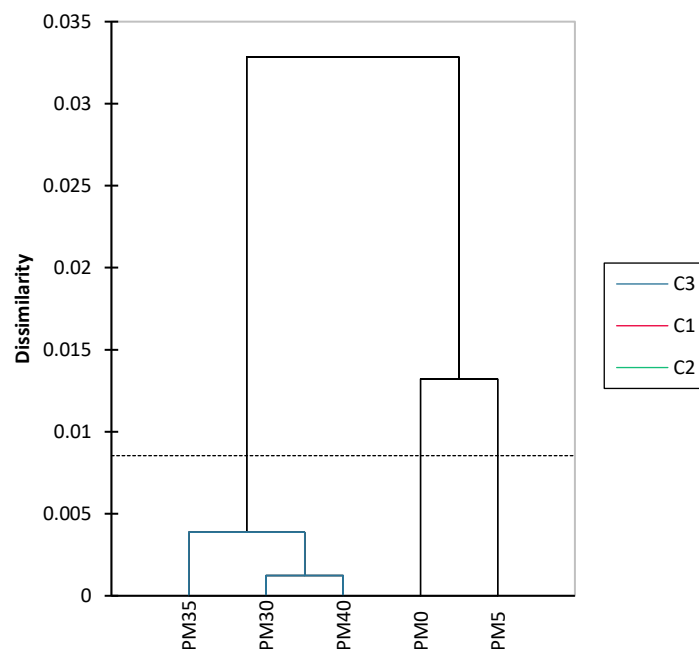

225 **Figure 4 Dendrogram of the Agglomerative Hierarchical Clustering (AHC) on bacteria species diversity in the PMP2 sediment samples of Muierilor Cave.**

### 3.2 The distribution of bacteria in the sedimentary profile with depth/age

When investigating the bacterial distribution with depth (Figs. 3-6) in the sedimentary profile, we discovered abundant species involved in biogeochemical cycles (S, Fe) or specific to different environments (soil, water, human), even extreme ones (thermophilic, halophilic).

230

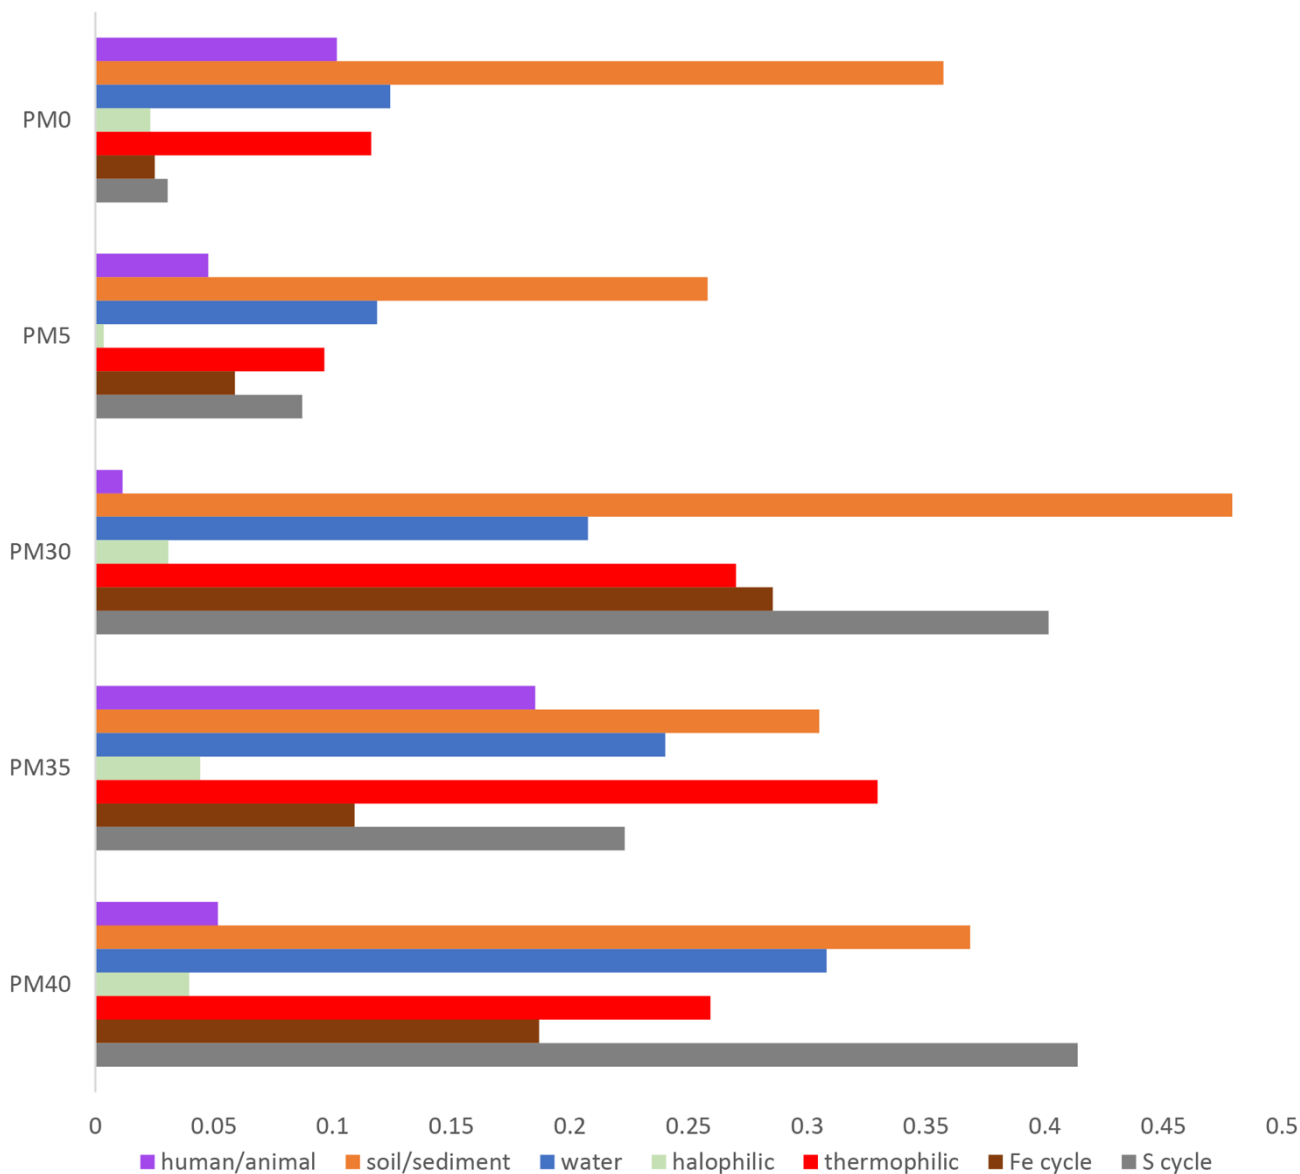

**Figure 5 Distribution of bacteria categories with depth in the PMP2 sediment profile of Muierilor Cave.**

235 The AHC analysis shows a strong separation of samples PM0 and PM5 from the other samples in the profile (Fig. 4) and the significant separation of the first two samples. The three lower samples are separated with less significance.

The family and species abundance in the profile first two depths (PM0; PM5) comprised bacteria commonly found in surface environments. Since some of them were identified throughout the profile, the plausible explanation is the input from the

surface. For example, *Roseisolibacter agri*, an agricultural soil bacterium (Pascual et al., 2018), was found only in PM5 and PM35. Moreover, the presence of halophilic and halotolerant bacteria (*Aidingibacillus halophilus* - PM30, PM40; *Algiphilus aromaticivorans* – PM5, PM30; *Halomonas lactosivorans* and *Saccharopolyspora deserti* – in all samples) could be linked to the rhizosphere, because it may have plant growth promoting characteristics (Reang et al., 2022). Furthermore, another link to the surface environments might be the presence of animal or human-related bacteria. Such bacteria were found in higher abundance in PM0 and very low or absent in the other samples. For instance, *Escherichia fergusonii*, which causes diseases in humans and animals (Gaastra et al., 2014), was found in all samples, with the highest abundance in PM0 (2%; and under 0.4% in the other samples); human gut bacteria (Pianta et al., 2017; Hosomi et al., 2022) such as *Blautia wexlerae* and *Prevotella copri* were found in low abundance in PM0 and PM35, while *Megamonas funiformis* previously found in human faeces (Sakon et al., 2008), was found in PM0, PM5, and PM35.

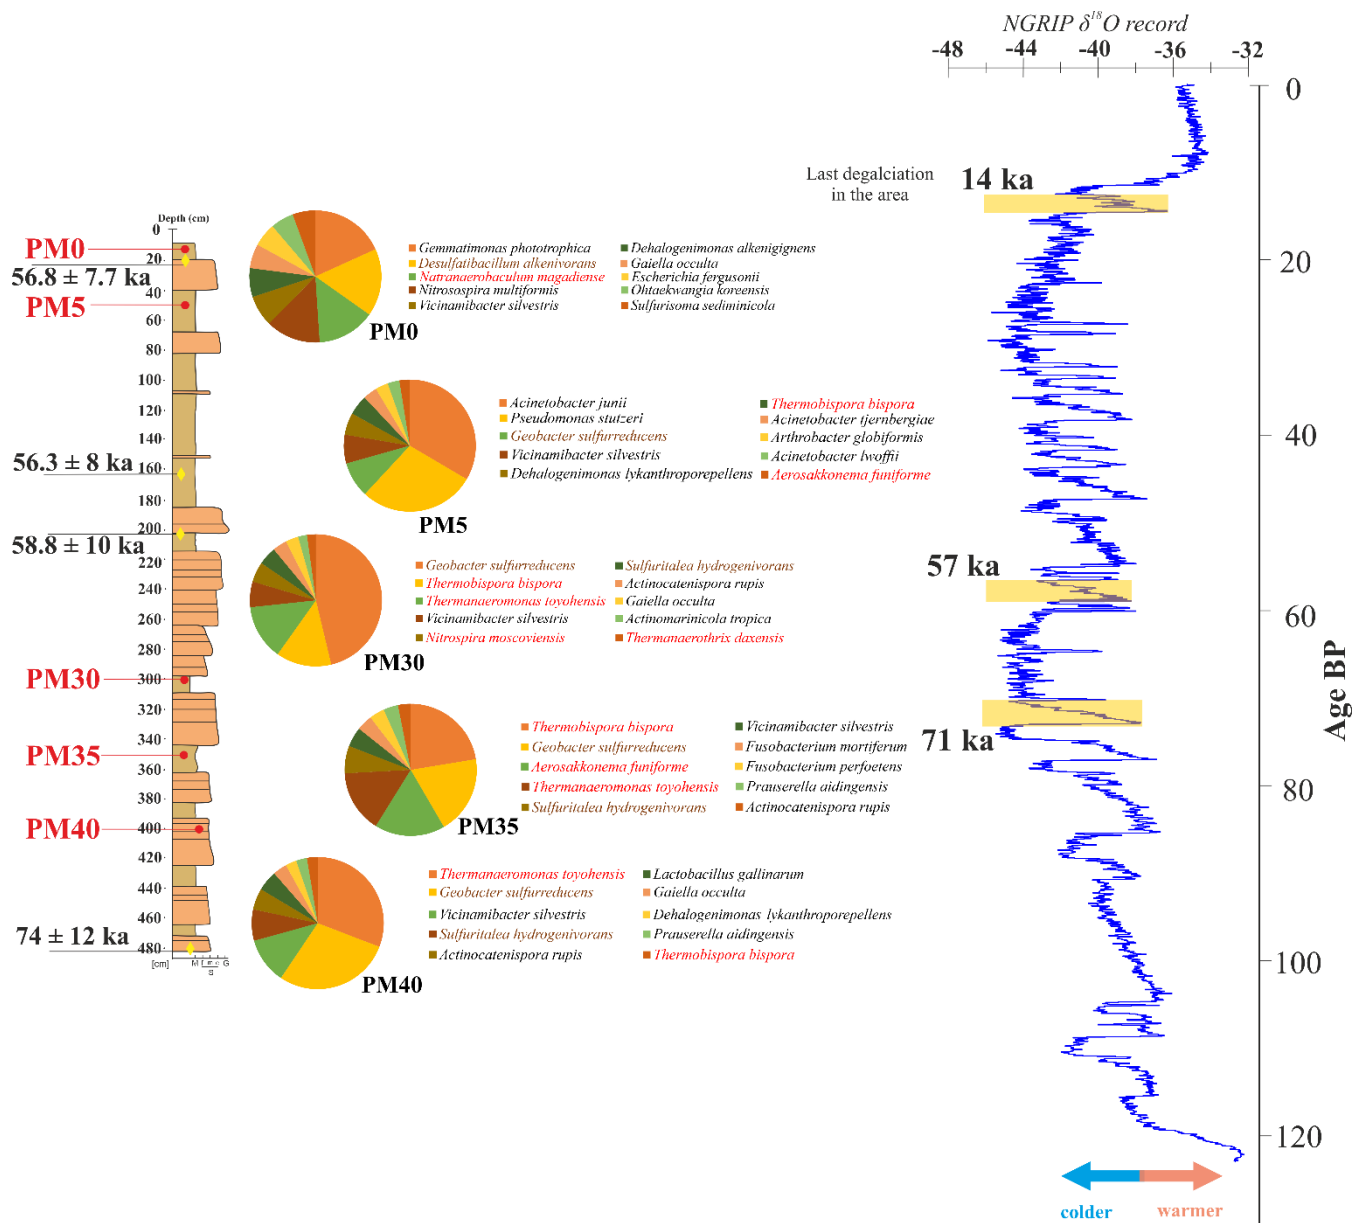

Figure 5 The distribution of bacteria at different depths in the analyzed Muierilor Cave deposits (left) compared to the isotopic oxygen and temperature variations (right; modified after North Greenland Ice Core Project, 2004); only the first 10 most abundant species in each sample (red-thermophiles, brown-involved in the S cycle) are represented.

#### 4 Discussion

The identified bacteria species from the first two sediment samples (PM0 and PM5 at 0 cm and -50 cm, respectively) are common in soils, indicating a direct input from the surface during the last fast flow episode(s). *Gemmatimonadaceae*,



255 *Desulfobacteraceae*, and *Natranaerobiaceae* were the most abundant families in PM0 and were commonly found in water, marine sediments, and soil (Chee-Sanford et al., 2019). Representatives of *Gemmatimonadaceae*, involved in the N cycle, are soil species (*Gemmatimonas aurantiaca*; Chee-Sanford et al., 2019) commonly found in agricultural soils (*G. kalamazoonesis*; Jia et al., 2022) or are phototrophic (*G. phototrophica*; Koblížek et al., 2020). *Desulfobacteraceae* representatives were isolated from oil-polluted sediments, being involved in the S cycle (*Desulfatibacillum alkenivorans*, *Desulfatiferula berrensis*; Hakil  
260 et al., 2014; Ding et al., 2024), and *Natranaerobaculum magadiense* from *Natranaerobiaceae* was isolated from soda lake sediments, and it is obligately alkaliphilic, anaerobic, thermo-, and halotolerant (Zavarzina et al., 2013).

In PM5, representatives of one of the most abundant families (*Moraxellaceae*) such as *Acinetobacter tjernbergiae* was commonly isolated from activated sludges (Yang, 2014), being involved in the P cycle and may have potential applications in the biological removal of phosphates (Täuber et al., 2022). *Psychrobacter aquimaris* is a halophilic bacterium isolated from  
265 seawater (Zhang et al., 2021). Denitrifying bacteria of *Pseudomonadaceae* were found in our samples (*Pseudomonas stutzeri*; Feng et al., 2020), and others previously isolated from marine sediments presenting an antagonistic activity (nitrification; *P. glareae*; Romanenko et al., 2015). *Geobacteraceae* representatives were mostly isolated from sediments except for *Geoalkalibacter subterraneus*, which was isolated from petroleum reservoir water (Greene et al., 2009). Representatives of this family are metal-reducers such as *G. subterraneus* - an anaerobic Fe(III)- and Mn(IV)-reducing bacterium (Greene et al.,  
270 2009); *G. ferrihydriticus* - an alkaliphilic, iron-reducing bacterium, isolated from lake sediments (Zavarzina et al. 2020); *Geobacter argillaceus* - a Fe(III)-reducing bacterium, isolated from subsurface kaolin strata (Shelobolina et al., 2007) and *G. sulfurreducens* is capable of reducing different forms of Fe(III), Mn(IV), U(VI), elemental sulfur, fumarate and malate (Engel et al., 2020), and was isolated from surface sediment of a hydrocarbon-contaminated soil (Caccavo et al., 1994). *Vicinamibacter silvestris* (*Vicinamibacteraceae*), a soil bacterium isolated from subtropical savanna soil (Huber et al., 2016)  
275 and from agriculture and residential (park) soil (Kim et al., 2022), was found in high relative abundances in all samples.

With depth, there was also an increase in the relative abundance of *Firmicutes* and *Actinobacteria*. This might be due to their resistant spores (Hashmi et al., 2020; Hazarika and Thakur, 2020), enabling the persistence unaffected by the environment for more extended periods (Hanson et al., 2012; de Rezende et al., 2013). For the deeper samples (PM30, PM35, PM40) that mark the transition from fast flow to still water, the relative abundances of families and species are quite similar amongst all three  
280 depths. *Thermoanaerobacteraceae* representatives are thermophilic, involved in different biogeochemical cycles, and were isolated from various substrates. Found in all three depth samples are *Brockia lithotrophica*, isolated from a terrestrial hot spring and is involved in the S cycle (Perevalova et al., 2013), *Thermanaeromonas toyohensis* isolated from a geothermal aquifer (Mori et al., 2002), and *Moorella stamsii* previously isolated from a digester sludge (Alves et al., 2013). *Desulfoviregula thermocuniculi* (PM30) was previously isolated from a geothermal underground mine (Kaksonen et al., 2007), and  
285 *Carboxydotherrmus hydrogenoformans* (PM30; PM35) grows with CO as their sole carbon source, was previously identified from a hot swamp (Henstra et al., 2004; Wu et al., 2005). The abundance of this family increases with depth.

Along the profile (see also Fig. 6), there is a transition of abundant species from soil Fe-reducing species (0 and -50 cm) to thermophilic involved in S cycle bacteria (-300 cm, -350 cm, and -400 cm), with the most abundant *Geobacter sulfurreducens*,

*Thermanaeromonas toyohensis*, and *Sulfuritalea hydrogenivorans*. The identified thermophilic bacteria involved in biogeochemical cycle of S cycle are *Thiobacter subterraneus* (PM0, PM5; found in a hot aquifer by Hirayama et al., 2005), *Thermodesulfobrio hydrogeniphilus* (all samples; found in a hot spring by Haouari et al., 2008), *Thermosulfurimonas dismutans* (PM5, PM30; deep-sea hydrothermal vent; Slobodkin et al., 2012), *Thiopropfundum lithotrophicum* (PM0, PM5, PM30, PM40; hydrothermal field; Mori et al., 2011). Bacteria involved in both the Fe and S cycles are *Acidiferrobacter thiooxydans* (PM0; an acidophilic, thermo-tolerant, copper mine drainage; Ma et al., 2022), and in Fe cycle *Aciditerrimonas ferrireducens* (PM0, PM5, PM30, PM40; acidophilic, geothermally heated field related with fumaroles emitting sulfurous gasses; Itoh et al., 2011). Sulphur can naturally occur in caves, also due to the presence of fossil bones and organic decay (Onac et al., 2011; Audra et al., 2019; Misra et al., 2019; Haidău et al., 2022); its biogeochemical cycle being driven by various microbial metabolic activities, including sulphate reduction and oxidation (Holmer and Storkholm, 2001; Takahashi et al., 2011; Fike et al., 2015; Zhu et al., 2021). With specific bacteria in our samples, we would conclude that their source must be a hot sulfurous environment around the cave.

*Streptosporangiaceae* with the thermophilic representative, *Thermobispora bispora*, was present in all samples but with higher abundance in PM30 and PM35. This bacterium was isolated from soil (Slobodkina et al., 2017). *Sterolibacteriaceae* representative *Sulfuritalea hydrogenivorans*, previously isolated from freshwater lakes, increases in abundance with depth. It can oxidize thiosulfate, sulfur, or hydrogen and degrade aromatic compounds (Sperfeld et al., 2019). *Nitrospira moscoviensis* was previously isolated from a heating system and was reported to be moderately thermophilic (Edwards et al., 2013).

The cyanobacterium *Aerosakkonema funiforme* (Oscillatoriaceae), found in all samples except for PM40, was previously isolated from a mesotrophic water reservoir (Thu et al., 2012), and from a hot spring microbial mat (Moreno et al., 2023), indicating its survival at high temperatures.

Additionally, lower abundance thermophiles were identified in the lower samples, like *Thermanaerotherix daxensis*, *Caldilinea tarbellica* found in deep hot aquifers (Grégoire et al., 2011), or in hot springs *Thermoanaerobaculum aquaticum* (Losey et al., 2013), *Thermincola carboxydiphila* (Sokolova et al., 2005), and *Carboxydothemus islandicus* (Novikov et al., 2011). Bacteria tolerating high temperatures, such as *Gaiella occulta* (deep mineral water aquifer; Albuquerque et al., 2011), were also found. A hydrogeological map of the area (Ghenea et al., 1981) included several mineral springs near Muierilor Cave, including thermal springs (Săcelu and Ciocadia) at less than 20 km distance. Some of them are well-known in the region for having therapeutic properties (Săcelu). In contrast, others were hard to identify in the field because of their low flow rate (Hîrșești see Fig. 1a). Direct proof of the existence of a thermal spring near Muierilor Cave (upstream of Galbenul River) is difficult to demonstrate due to the complex morpho-dynamic evolution of the river slopes. By the abundance of thermophilic bacteria, we presume that the hot spring was present in the area and was the source of old input(s) of water in the cave. Although high concentrations of S and Fe can originate from fossil bones and organic decay in caves (Audra et al., 2019; Misra et al., 2019; Haidău et al., 2022), the thermophiles point to a different possible source, a hot spring.

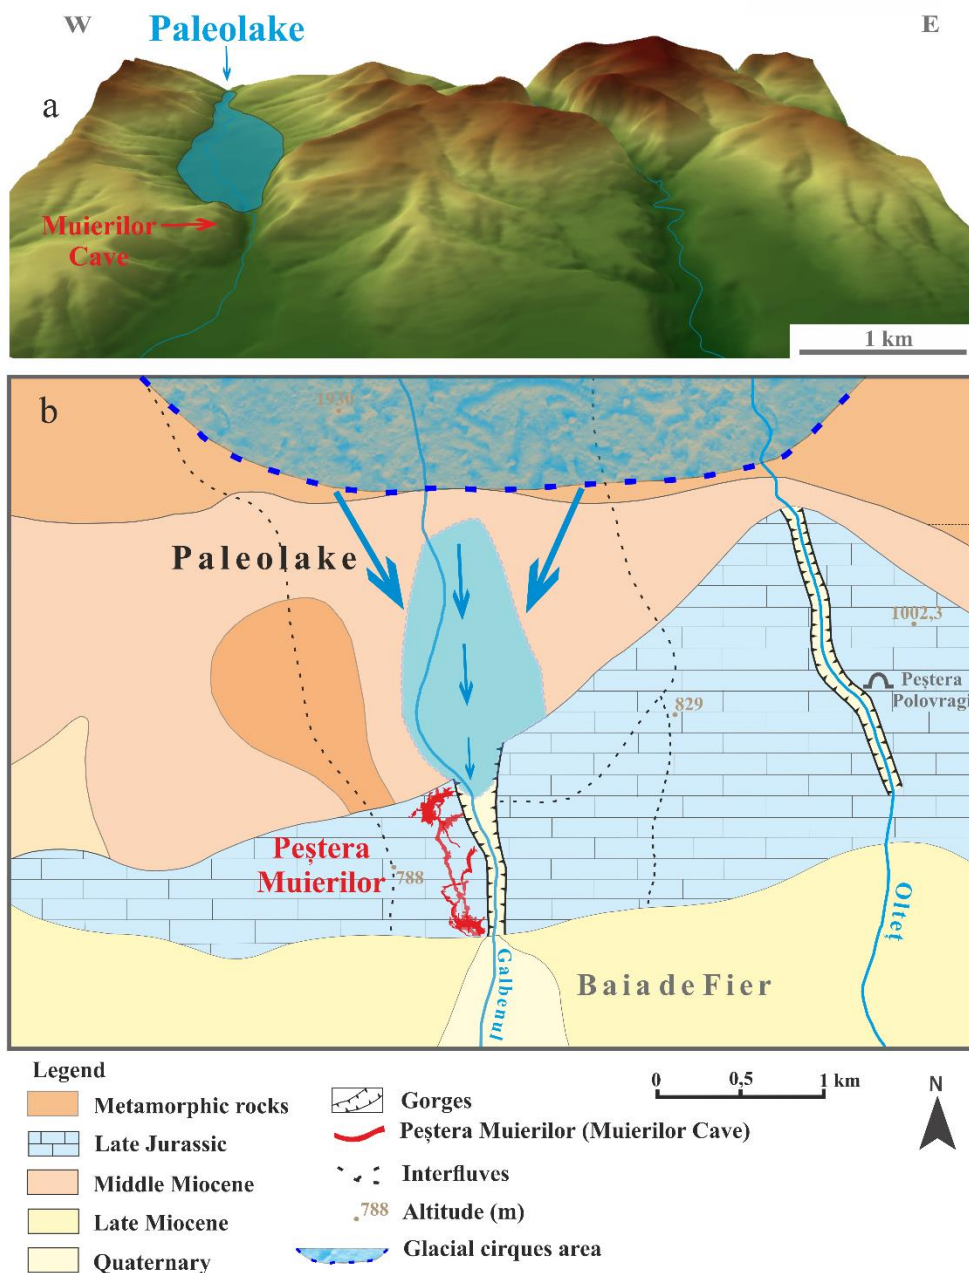

**Figure 7** Digital elevation model of the relief near Muierilor Cave (a) with the hypothetical position of the paleolake relative to Muierilor Cave and the flow direction during periods of high-water input from the upstream mountains (b; modified after Lupu & Ion, 1962).

325 Nevertheless, we do not rule out other possible sources and inputs, such as lacustrine organic sediments near the cave system. In certain conditions, sapropel sediments may form in small freshwater lakes (Leonova et al., 2019). Lupu & Ion (1962) reported the presence of a former lake upstream of the cave system, with intermittent inflows in the cave passages related to the water availability from the snow and ice melting in the high mountains (Parâng Mountains; Fig. 7). Sapropels are characterized mainly as biogenic lake sediments, sludge sediment composed of organic matter and traces of clay, sand, or  
330 calcium carbonate (Leonova et al., 2019) with high concentrations of S amongst others (Mg, Fe, Ca) (Taran et al., 2018; Bogush et al., 2022). Moreover, Bogush et al. (2022) found that sulphate-reducing bacteria in a sapropel core from a lake near Baikal increased with depth, probably because such bacteria are important decomposers of organic matter. Thermophilic bacteria are crucial in decomposition, especially when temperatures reach 70°C for several weeks (Finore et al., 2023). Furthermore, S in our samples could result from the intensive decomposition, thermophiles being active in organic matter  
335 mineralization, and releasing inorganic nutrients (González et al., 2023).

The extensive clay deposits in the cave passages can also be related to the inputs from the former lake upstream of the cave system, a possible low-flow episode(s). Even though the OSL uncertainties span thousands of years, other proxies (e.g., fossil remains, speleothems) dated from the cave passages constrained sediment deposition with the flooding events from the MIS 5 through the Holocene (Mirea et al., 2021). These sedimentation stages (episodes) can be associated with different climate  
340 events from the MIS 5 to the Holocene (Pleistocene), with warmer periods characterized by water and sediment input in the cave.

Microbial communities in caves are shaped by the constant input from the surface environments (Wu et al., 2015). Therefore, the possibility of such bacteria being sourced from the surface is high. Thermophiles are thought to survive only in high-temperature habitats like compost heaps (Finore et al., 2023), hot springs (Benammar et al., 2020; Kochetkova et al., 2022),  
345 or deep-sea hydrothermal vents (Miroshnichenko and Bonch-Osmolovskaya, 2006; Zeng et al., 2021). However, they were also found in cool and temperate soils (Portillo et al., 2012; González et al., 2015; Santana and González, 2015; Santana et al., 2020; Milojevic et al., 2022), strengthening the idea of microbial dispersal and the possibility of tracking their movement (Müller et al., 2014; Rime et al., 2016; Comte et al., 2017; Bell et al., 2018; Walters et al., 2022). Thermophiles can disperse on short or long distances from hot sources by water or wind (Portillo and González, 2008; Hubert et al., 2009; Perfumo and  
350 Marchant, 2010; Portillo et al., 2012; Bell et al., 2018). Soil is also a possible source. Thermophiles in temperate soils were considered vegetative viable organisms (Portillo et al., 2012; González et al., 2023), with the potential involvement in biogeochemical reactions (González et al., 2015, 2023). Recent studies on soil microbiota have included thermophiles as a permanent component despite their strict ecological requirements (Portillo et al., 2012; Santana and González, 2015; González et al., 2023). Thermophiles that inhabit the upper soil layers are believed to grow and show significant enzymatic activity  
355 during hot days (>30°C) to produce and stock extracellular enzymes that can help their activity under stress conditions (such as lower-temperature, dryness) (Milojevic et al., 2022; Gomez et al., 2021). For example, thermophiles showed enzymatic activity for more than 100 days per year at around 37°N in Seville, Spain, and even only 1-2 hot days per year at 52°N in Cambridge, UK (Santana and González, 2015). There are ~ 40 hot days in Romania per year (Micu et al., 2015), and

thermophilic bacteria can survive in the soil. During extreme events, the thermophilic enzymes could decompose soil organic matter into smaller compounds (Santana et al., 2020), releasing N as ammonium (Portillo, et al., 2012) and S as sulfate (Portillo et al., 2012; Santana et al., 2021), at a higher rate than soil mesophiles (Portillo et al., 2012), indicating that S cycle in soils is performed mainly by them (Santana et al., 2021). A possibly high abundance of thermophiles in the soil could explain their high abundance in the cave.

The presence of bacteria involved in Fe and S cycles in all our samples that date from the last interstadial could have different explanations. The deposit of fossil bones, or guano (Misra et al., 2019; Haidău et al., 2022) in the cave can be an essential source of these bacteria. Detrital clay (Audra et al., 2019) can be another source of these bacteria. The depositional condition of the fossil remains from the Urșilor Passage contributed to a rapid burial (e.g., fast flow phases), resulting in a slow diagenetic process with few mineral exchanges (mostly apatite-related minerals) on long-term sedimentation. Different minerals in the upper levels were related to phosphate-rich deposits (bone and guano degradation; Haidău et al., 2022) at the same level as the studied profile. The interconnected passages of the cave on different levels (upper and lower) by shafts can influence the concentration of various minerals by the mixed sediment inputs.

Tracing the effects of these paleofloods on bacterial communities within the cave passages was challenging, as reconstructing the precise environmental conditions during those periods is difficult. Moreover, this study serves as supplementary information aimed at enhancing our understanding of past environments in the region. The key events contributing to sediment are the paleofloods that occurred during warmer and wetter conditions in the region. Most of our bacterial findings correlate with these events, indicating a significant influx of bacteria from outside the cave. No other major processes, such as bioturbation or collapse, have been identified in relation to the analyzed sediments.

Moreover, the bacterial abundance growth with depth could be correlated with the age of the sediments and be linked to more stable phases of the cave passages evolution when the sedimentation processes developed under a slow energy environment (Mirea, 2020; Mirea et al., 2021). Mirea et al. (2021) showed that the top sediments within the Urșilor Passage are linked with the warm condition of the Bølling–Allerød interstadial, the last inflow around ~14.7 ka. Thus, it explains the different bacterial compositions correlated with sediment type and age.

## 5 Conclusions

The bacterial composition of a 480 cm deep profile in Muierilor Cave presented a clear difference between the upper (PM0, PM5) and bottom (PM30, PM35, PM40) samples. The composition changes with depth, from the dominance of soil-specific, Fe-reducing bacterial species to the dominant thermophilic, involved in S cycle bacteria. The presence of bacteria involved in Fe and S cycles can be due to the presence of an abundance of fossil bones in the cave, probably brought inside the cave together with the sediments during the episodic paleofloods events associated with the end of MIS 5a and MIS 3 (Pleistocene). Thermophiles found in higher abundance in the lower part of the profile could originate from a warm water source in the area

390 or from the soils above the cave during a warmer period. Still, their origin is yet to be determined. The presence of lacustrine organic sediments (sapropelic sediments) near the cave system can also be considered.

The study shows that bacteria in cave deposits can be used in a multi-proxy archive to understand sediment sources and the climate during deposition, as was proposed for other cave sites and organisms (Epure et al. 2014, 2017; Moldovan et al. 2011, 2016). It shows that for old sediments with complex depositional histories, Bacteria can offer new information at the time of

395 deposition that can support or add to the entire understanding of the paleoenvironments.

### Appendix A

Table A1. The most abundant bacteria in the analyzed sediments (PM0, PM5, PM35, PM40).

| Phylum                | Class                      | Family                         | Species                                     | PM0   | PM5   | PM30  | PM35  | PM40  |
|-----------------------|----------------------------|--------------------------------|---------------------------------------------|-------|-------|-------|-------|-------|
| <i>Proteobacteria</i> | <i>Gammaproteobacteria</i> | <i>Acidiferrobacteraceae</i>   | <i>Acidiferrobacter thiooxydans</i>         | 0.011 | 0     | 0     | 0     | 0     |
| <i>Proteobacteria</i> | <i>Gammaproteobacteria</i> | <i>Moraxellaceae</i>           | <i>Acinetobacter junii</i>                  | 0     | 0.213 | 0     | 0     | 0.001 |
| <i>Proteobacteria</i> | <i>Gammaproteobacteria</i> | <i>Moraxellaceae</i>           | <i>Acinetobacter lwoffii</i>                | 0.002 | 0.018 | 0     | 0     | 0     |
| <i>Proteobacteria</i> | <i>Gammaproteobacteria</i> | <i>Moraxellaceae</i>           | <i>Acinetobacter tjernbergiae</i>           | 0     | 0.022 | 0     | 0     | 0     |
| <i>Actinobacteria</i> | <i>Actinomycetia</i>       | <i>Micromonosporaceae</i>      | <i>Actinocatenispora rupis</i>              | 0     | 0.013 | 0.021 | 0.016 | 0.032 |
| <i>Actinobacteria</i> | <i>Acidimicrobiia</i>      | <i>Iamiaceae</i>               | <i>Actinomarinicola tropica</i>             | 0     | 0.002 | 0.013 | 0.006 | 0.008 |
| <i>Proteobacteria</i> | <i>Gammaproteobacteria</i> | <i>Aeromonadaceae</i>          | <i>Aeromonas veronii</i>                    | 0.019 | 0     | 0.002 | 0.002 | 0.005 |
| <i>Cyanobacteria</i>  |                            | <i>Oscillatoriaceae</i>        | <i>Aerosakkonema funiforme</i>              | 0.001 | 0.016 | 0     | 0.092 | 0     |
| <i>Proteobacteria</i> | <i>Gammaproteobacteria</i> | <i>Algiphilaceae</i>           | <i>Algiphilus aromaticivorans</i>           | 0     | 0     | 0.011 | 0     | 0     |
| <i>Actinobacteria</i> | <i>Actinomycetia</i>       | <i>Micrococcaceae</i>          | <i>Arthrobacter globiformis</i>             | 0.004 | 0.019 | 0     | 0     | 0.004 |
| <i>Proteobacteria</i> | <i>Betaproteobacteria</i>  | <i>Zoogloeaceae</i>            | <i>Azoarcus olearius</i>                    | 0.019 | 0.002 | 0.003 | 0.002 | 0.007 |
| <i>Firmicutes</i>     | <i>Clostridia</i>          | <i>Thermoanaerobacteraceae</i> | <i>Brockia lithotrophica</i>                | 0     | 0     | 0.011 | 0.004 | 0.008 |
| <i>Chloroflexi</i>    | <i>Dehalococcoidia</i>     |                                | <i>Dehalogenimonas alkenigignens</i>        | 0.027 | 0.001 | 0.003 | 0     | 0     |
| <i>Chloroflexi</i>    | <i>Dehalococcoidia</i>     |                                | <i>Dehalogenimonas lykanthroporepellens</i> | 0.006 | 0.034 | 0.004 | 0.008 | 0.016 |

|                         |                            |                                         |                                        |       |       |       |       |       |
|-------------------------|----------------------------|-----------------------------------------|----------------------------------------|-------|-------|-------|-------|-------|
| <i>Proteobacteria</i>   | <i>Deltaproteobacteria</i> | <i>Desulfobacteraceae</i>               | <i>Desulfatibacillum alkenivorans</i>  | 0.065 | 0     | 0     | 0     | 0     |
| <i>Proteobacteria</i>   | <i>Alphaproteobacteria</i> | <i>Rhodospirillaceae</i>                | <i>Dongia mobilis</i>                  | 0.014 | 0.001 | 0     | 0     | 0     |
| <i>Proteobacteria</i>   | <i>Gammaproteobacteria</i> | <i>Enterobacteriaceae</i>               | <i>Escherichia fergusonii</i>          | 0.022 | 0.001 | 0.001 | 0.003 | 0.004 |
| <i>Firmicutes</i>       | <i>Clostridia</i>          | <i>Oscillospiraceae</i>                 | <i>Faecalibacterium prausnitzii</i>    | 0.018 | 0     | 0     | 0     | 0     |
| <i>Proteobacteria</i>   | <i>Alphaproteobacteria</i> | <i>Hyphomicrobiaceae</i>                | <i>Filomicrobium fusiforme</i>         | 0     | 0.001 | 0     | 0     | 0.010 |
| <i>Fusobacteria</i>     | <i>Fusobacteriia</i>       | <i>Fusobacteriaceae</i>                 | <i>Fusobacterium mortiferum</i>        | 0     | 0     | 0     | 0.020 | 0     |
| <i>Fusobacteria</i>     | <i>Fusobacteriia</i>       | <i>Fusobacteriaceae</i>                 | <i>Fusobacterium perfoetens</i>        | 0     | 0     | 0     | 0.019 | 0     |
| <i>Actinobacteria</i>   | <i>Rubrobacteria</i>       | <i>Gaiellaceae</i>                      | <i>Gaiella occulta</i>                 | 0.023 | 0.004 | 0.018 | 0.008 | 0.021 |
| <i>Gemmatimonadetes</i> | <i>Gemmatimonadetes</i>    | <i>Gemmatimonadaceae</i>                | <i>Gemmatimonas phototrophica</i>      | 0.071 | 0.002 | 0.004 | 0.007 | 0.008 |
| <i>Proteobacteria</i>   | <i>Deltaproteobacteria</i> | <i>Geobacteraceae</i>                   | <i>Geobacter sulfurreducens</i>        | 0.001 | 0.055 | 0.278 | 0.103 | 0.175 |
| <i>Firmicutes</i>       | <i>Bacilli</i>             | <i>Lactobacillaceae</i>                 | <i>Lactobacillus gallinarum</i>        | 0.003 | 0     | 0     | 0     | 0.030 |
| <i>Firmicutes</i>       | <i>Bacilli</i>             | <i>Lactobacillaceae</i>                 | <i>Latilactobacillus sakei</i>         | 0.017 | 0     | 0     | 0     | 0     |
| <i>Verrucomicrobia</i>  | <i>Verrucomicrobiae</i>    | <i>Verrucomicrobia</i><br>subdivision 3 | <i>Limisphaera ngatamarikiensis</i>    | 0     | 0.003 | 0.010 | 0.001 | 0     |
| <i>Bacteroidetes</i>    | <i>Bacteroidia</i>         | <i>Bacteroidaceae</i>                   | <i>Mediterranea massiliensis</i>       | 0     | 0     | 0     | 0.015 | 0     |
| <i>Firmicutes</i>       | <i>Clostridia</i>          | <i>Natranaerobiaceae</i>                | <i>Natranaerobaculum magadiense</i>    | 0.055 | 0     | 0     | 0     | 0     |
| <i>Proteobacteria</i>   | <i>Betaproteobacteria</i>  | <i>Nitrosomonadaceae</i>                | <i>Nitrospira multiformis</i>          | 0.052 | 0.005 | 0.003 | 0     | 0.005 |
| <i>Nitrospirae</i>      | <i>Nitrospira</i>          | <i>Nitrospiraceae</i>                   | <i>Nitrospira japonica</i>             | 0.011 | 0.010 | 0     | 0     | 0     |
| <i>Nitrospirae</i>      | <i>Nitrospira</i>          | <i>Nitrospiraceae</i>                   | <i>Nitrospira moscoviensis</i>         | 0.011 | 0.004 | 0.029 | 0.009 | 0.008 |
| <i>Bacteroidetes</i>    | <i>Cytophagia</i>          | <i>Fulvivirgaceae</i>                   | <i>Ohtaekwangia koreensis</i>          | 0.022 | 0     | 0     | 0     | 0     |
| <i>Firmicutes</i>       | <i>Clostridia</i>          | <i>Peptococcaceae</i>                   | <i>Pelotomaculum thermopropionicum</i> | 0     | 0     | 0.011 | 0     | 0.003 |
| <i>Firmicutes</i>       | <i>Clostridia</i>          | <i>Peptostreptococcaceae</i>            | <i>Peptacetobacter hiranonis</i>       | 0     | 0     | 0     | 0.011 | 0     |



|                       |                            |                                |                                        |       |       |       |       |       |
|-----------------------|----------------------------|--------------------------------|----------------------------------------|-------|-------|-------|-------|-------|
| <i>Actinobacteria</i> | <i>Actinomycetia</i>       | <i>Pseudonocardiaceae</i>      | <i>Prauserella aidingensis</i>         | 0.007 | 0.001 | 0.007 | 0.019 | 0.016 |
| <i>Proteobacteria</i> | <i>Alphaproteobacteria</i> | <i>Xanthobacteraceae</i>       | <i>Pseudolabrys taiwanensis</i>        | 0.002 | 0.010 | 0     | 0     | 0     |
| <i>Proteobacteria</i> | <i>Gammaproteobacteria</i> | <i>Pseudomonadaceae</i>        | <i>Pseudomonas stutzeri</i>            | 0     | 0.181 | 0     | 0     | 0     |
| <i>Firmicutes</i>     | <i>Bacilli</i>             | <i>Sporolactobacillaceae</i>   | <i>Scopulibacillusarangshiensis</i>    | 0.005 | 0     | 0.003 | 0.010 | 0.006 |
| <i>Proteobacteria</i> | <i>Betaproteobacteria</i>  | <i>Sterolibacteriaceae</i>     | <i>Sulfurisoma sediminicola</i>        | 0.022 | 0     | 0.001 | 0     | 0     |
| <i>Proteobacteria</i> | <i>Betaproteobacteria</i>  | <i>Sterolibacteriaceae</i>     | <i>Sulfuritalea hydrogenivorans</i>    | 0.005 | 0.002 | 0.026 | 0.036 | 0.047 |
| <i>Proteobacteria</i> | <i>Deltaproteobacteria</i> | <i>Syntrophaceae</i>           | <i>Syntrophus aciditrophicus</i>       | 0.018 | 0     | 0     | 0     | 0     |
| <i>Firmicutes</i>     | <i>Clostridia</i>          | <i>Thermoanaerobacteraceae</i> | <i>Thermanaeromonas toyohensis</i>     | 0     | 0.015 | 0.081 | 0.082 | 0.189 |
| <i>Chloroflexi</i>    | <i>Anaerolineae</i>        | <i>Anaerolineaceae</i>         | <i>Thermanaerotherix daxensis</i>      | 0     | 0     | 0.013 | 0.006 | 0     |
| <i>Actinobacteria</i> | <i>Actinomycetia</i>       | <i>Streptosporangiaceae</i>    | <i>Thermobispora bispora</i>           | 0     | 0.031 | 0.081 | 0.120 | 0.016 |
| <i>Chloroflexi</i>    | <i>Anaerolineae</i>        | <i>Anaerolineaceae</i>         | <i>Thermomarinilinea lacunifontana</i> | 0.003 | 0.002 | 0.006 | 0.001 | 0.010 |
| <i>Planctomycetes</i> | <i>Planctomycetia</i>      | <i>Thermoguttaceae</i>         | <i>Thermostilla marina</i>             | 0.010 | 0.001 | 0.001 | 0     | 0     |
| <i>Acidobacteria</i>  | <i>Vicinamibacteria</i>    | <i>Vicinamibacteraceae</i>     | <i>Vicinamibacter silvestris</i>       | 0.029 | 0.044 | 0.037 | 0.025 | 0.069 |

## Data availability

400 The raw data were deposited in the NCBI SRA Sequence Read Archive under the BioProject: PRJNA1161469, with BioSample accessions: SAMN43780924, SAMN43780925, SAMN43780926, SAMN43780927, SAMN43780928, SAMN43780929, SAMN43780930, SAMN43780931, SAMN43780932.

## Author contribution

OTM designed the study; CH made the extractions; CH, OTM, and ICM wrote the manuscript; OTM, ICM and SC made the paleoclimatic interpretation; all authors read and approved the manuscript.

405

## Competing interests

The authors declare that they have no conflict of interest.

## Acknowledgments

We thank Alexandra Hillebrand-Voiculescu and Luchiana Faur for helping us with the sampling campaign and suggestions.

410 We are also thankful to Stelian Grigore, Cristinel Fofirică, Arthur Dăscălescu, and Marius Iliescu (“Hades” Caving Club, Romania), the discoverers of the Hades Passage for providing the base map of the cave.

## Financial support

This research was financially supported by the Ministry of Research, Innovation and Digitization grant, CNCS/CCCDI – UEFISCDI, project no. 2/2019 (DARKFOOD), within PNCDI III, the EEA Financial Mechanism 2014–2021 under project  
415 contract no. 3/2019 (KARSTHIVES 2), and the grant PN-III-P1-1.1-PD-2021-0262 (PALEOTRACE)

## References

- Albuquerque, L., França, L., Rainey, F. A., Schumann, P., Nobre, M. F., and da Costa, M. S.: *Gaiella occulta* gen. nov., sp. nov., a novel representative of a deep branching phylogenetic lineage within the class Actinobacteria and proposal of Gaiellaceae fam. nov. and Gaiellales ord. nov., Syst. Appl. Microbiol., 34(8), 595-599, doi: <https://doi.org/10.1016/j.syapm.2011.07.001>, 2011.
- 420 <https://doi.org/10.1016/j.syapm.2011.07.001>, 2011.
- Alves, J. I., van Gelder, A. H., Alves, M. M., Sousa, D. Z., and Plugge, C. M.: *Moorella stamsii* sp. nov., a new anaerobic thermophilic hydrogenogenic carboxydotroph isolated from digester sludge, IJSEM, 63(Pt\_11), 4072-4076, doi: <https://doi.org/10.1099/ijs.0.050369-0>, 2013.
- Audra, P., De Waele, J., Bentaleb, I., Chroòáková, A., Krištufek, V., D’Angeli, I. M., Carbone, C., Madonia, G., Vattano, M.,  
425 Scopelliti, G., Caihol, D., Vanara, N., Temovski, M., Bigot, Y-J., Nobécourt, C-J., Galli, E., Rull, F., and Sanz-Arranz, A.: Guano-related phosphate-rich minerals in European caves, Int. J. Speleol., 48, 75–105, doi: <https://doi.org/10.5038/1827-806X.48.1.2252>, 2019.
- Bandrabur, G., and Bandrabur, R.: Parâng and Capațanii Mountains, in: Karst Hydrogeology of Romania, edited by Orașeanu, I., Iurkiewicz, A., Belvedere, Oradea, 69–75, 2010.
- 430 Barbato, R. A., Jones, R. M., Douglas, T. A., Esdale, J., Foley, K., Perkins, E. J., Rosten, S., and Garcia-Reyero, N.: Alaskan palaeosols in modern times: Deciphering unique microbial diversity within the late-Holocene, The Holocene, 32(9), 909-923, doi: <https://doi.org/10.1177/09596836221101249>, 2022.

- Bay, S. K., McGeoch, M. A., Gillor, O., Wieler, N., Palmer, D. J., Baker, D. J., Chown, S. L., and Greening, C.: Soil bacterial communities exhibit strong biogeographic patterns at fine taxonomic resolution, *mSystems*, 5, 10.1128/msystems.00540-20, doi: <https://doi.org/10.1128/msystems.00540-20>, 2020.
- 435 Bell, E., Blake, L. I., Sherry, A., Head, I. M., and Hubert, C. R.: Distribution of thermophilic endospores in a temperate estuary indicate that dispersal history structures sediment microbial communities, *Environ. Microbiol.*, 20(3), 1134-1147, doi: <https://doi.org/10.1111/1462-2920.14056>, 2018.
- Benammar, L., İnan Bektaş, K., Menasria, T., Beldüz, O. A., Güler, H. I., Bedaida, I. K., Gonzalez, J. M., and Ayachi, A.: Diversity and enzymatic potential of thermophilic bacteria associated with terrestrial hot springs in Algeria, *Braz. J. Microbiol.*, 51, 1987–2007, doi: <https://doi.org/10.1007/s42770-020-00376-0>, 2020.
- 440 Bernal, J. P., Revolorio, F., Cu-Xi, M., Lases-Hernández, F., Piacsek, P., Lachniet, M. S., Beddows, A. P., Lucia, G., López-Aguilar, K., Capella-Vizcaíno, S., López-Martínez, R., and Vásquez, O. J.: Variability of trace-elements and  $\delta^{18}\text{O}$  in drip water from Gruta del Rey Marcos, Guatemala; seasonal and environmental effects, and its implications for paleoclimate reconstructions, *Front. in Earth Sci.*, 11, 1112957, doi: <https://doi.org/10.3389/feart.2023.1112957>, 2013.
- 445 Berto, C., Krajcarz, M. T., Moskal-del Hoyo, M., Komar, M., Sinet-Mathiot, V., Zarzecka-Szubińska, K., Krajcarz, M., Szymanek, M., Wertz, K., Marciszak, A., Mętrak, M., Suska-Malawska, M., Wilcke, A., and Kot, M.: Environment changes during Middle to Upper Palaeolithic transition in southern Poland (Central Europe). A multiproxy approach for the MIS 3 sequence of Koziarnia Cave (Kraków-Częstocgt Upland), *J. Archaeol. Sci. Rep.*, 35, 102723, doi: <https://doi.org/10.1016/j.jasrep.2020.102723>, 2021.
- 450 Bogush, A. A., Leonova, G. A., Krivonogov, S. K., Bychinsky, V. A., Bobrov, V. A., Maltsev, A. E., Tikhova, D. V., Miroshnichenko, L. V., Kondratyeva, M. L., and Kuzmina, A. E.: Biogeochemistry and element speciation in sapropel from freshwater Lake Dukhovoe (East Baikal region, Russia), *Appl. Geochem.*, 143, 105384, doi: <https://doi.org/10.1016/j.apgeochem.2022.105384>, 2022.
- 455 Buttler, C. J., and Wilson, M. A.: Paleoecology of an Upper Ordovician submarine cave-dwelling bryozoan fauna and its exposed equivalents in northern Kentucky, USA, *J. Paleontol.*, 92(4), 568-576, doi: <https://doi.org/10.1017/jpa.2017.131>, 2018.
- Caccavo F. J., Lonergan D. J., Lovley D. R., Davis M., Stolz J. F., and McInerney M. J.: *Geobacter sulfurreducens* sp. nov., a hydrogen- and acetate-oxidizing dissimilatory metal-reducing microorganism, *Appl. Environ. Microbiol.*, 60, 3752–3759, doi: <https://doi.org/10.1128/aem.60.10.3752-3759.1994>, 1994.
- 460 Campaña, I., Benito-Calvo, A., Pérez-González, A., Ortega, A. I., Álvaro-Gallo, A., Miguens-Rodríguez, L., Iglesias-Cibanal, J., Bermúdez de Castro, J.M., and Carbonell, E.: Reconstructing depositional environments through cave interior facies: The case of Galería Complex (Sierra de Atapuerca, Spain), *Geomorphology*, 440, 108864, <https://doi.org/10.1016/j.geomorph.2023.108864>, 2023.

- 465 Castro, H. F., Classen, A. T., Austin, E. E., Norby, R. J., and Schadt, C. W.: Soil microbial community responses to multiple experimental climate change drivers, *Appl. Environ. Microbiol.*, 76(4), 999-1007, doi: <https://doi.org/10.1128/AEM.02874-09>, 2010.
- Chee-Sanford, J., Tian, D., and Sanford, R.: Consumption of N<sub>2</sub>O and other N-cycle intermediates by *Gemmatimonas aurantiaca* strain T-27, *Microbiol.*, 165(12), 1345-1354, doi: <https://doi.org/10.1099/mic.0.000847>, 2019.
- 470 Comte, J., Langenheder, S., Berga, M., and Lindström, E. S.: Contribution of different dispersal sources to the metabolic response of lake bacterioplankton following a salinity change, *Environ. Microbiol.*, 19(1), 251-260, doi: <https://doi.org/10.1111/1462-2920.13593>, 2017.
- Constantin, S., Mirea, I. C., Petculescu, A., Arghir, R. A., Măntoiu, D. Ș., Kenesz, M., Robu, M., and Moldovan, O. T: Monitoring human impact in show caves. A study of four Romanian caves, *Sustainability*, 13(4), 1619, doi: <https://doi.org/10.3390/su13041619>, 2021.
- 475 Cruz, J. A., Velasco, J.A., Arroyo-Cabrales, J., and Johnson, E.: Paleoclimatic reconstruction based on the Late Pleistocene San Josecito Cave Stratum 720 Fauna Using Fossil Mammals, Reptiles, and Birds, *Diversity*, 15, 7:881, doi: <https://doi.org/10.3390/d15070881>, 2023.
- Dattagupta, S., Schaperdorth, I., Montanari, A., Mariani, S., Kita, N., Valley, W. J., and Macalady, L. J.: A novel symbiosis  
480 between chemoautotrophic bacteria and a freshwater cave amphipod, *ISME J.*, 3, 935–943, doi: <https://doi.org/10.1038/ismej.2009.34>, 2009.
- de Rezende, J. R., Kjeldsen, K. U., Hubert, C. R. J., Finster, K., Loy, A. and Jørgensen, B. B.: Dispersal of thermophilic Desulfotomaculum endospores into Baltic Sea sediments over thousands of years, *ISME J.*, 7, 72-84. doi: <https://doi.org/10.1038/ismej.2012.83>, 2013.
- 485 Diaconu, G., Dumitraș, D., and Marincea, Ș.: Mineralogical analyses in peștera Polovragi (Oltețului gorges) and peștera Muierilor (Galbenului Gorges), Gorj County. *Trav. Institut. Speol. —Emile Racovitza XLVII*, 89–105, 2008.
- Ding, S., Grossi, V., Hopmans, E. C., Bale, N. J., Cravo-Laureau, C., and Sinninghe Damsté, J. S.: Nitrogen and sulfur for phosphorus: Lipidome adaptation of anaerobic sulfate-reducing bacteria in phosphorus-deprived conditions, *PNAS*, 121(24), e2400711121, doi: <https://doi.org/10.1073/pnas.2400711121>, 2004.
- 490 Domeignoz-Horta, L. A., Shinfuku, M., Junier, P., Poirier, S., Verrecchia, E., Sebag, D., and DeAngelis, K. M.: Direct evidence for the role of microbial community composition in the formation of soil organic matter composition and persistence, *ISME Communications*, 1(1), 64, doi: <https://doi.org/10.1038/s43705-021-00071-7>, 2021.
- Dominguez-Moñino I, Jurado V, Rogerio-Candelera MA, Hermosin B, and Saiz-Jimenez C.: Airborne bacteria in show caves from Southern Spain, *Microb. Cell*, 26, 8(10), 247-255, doi: <https://doi.org/10.15698%2Fmic2021.10.762>, 2021.
- 495 Dong, Y., Gao, J., Wu, Q. Ai, Y., Huang, Y., Wei, W., Sun, S., and Weng, Q.: Co-occurrence pattern and function prediction of bacterial community in Karst cave, *BMC Microbiol.*, 20, 137, doi: <https://doi.org/10.1186/s12866-020-01806-7>, 2020.
- Edwards, T. A., Calica, N. A., Huang, D. A., Manoharan, N., Hou, W., Huang, L., Manoharan, N., Hou, W., Huang, L., Panosyan, H., Dong, H. and Hedlund, B. P.: Cultivation and characterization of thermophilic *Nitrospira* species from

- geothermal springs in the US Great Basin, China, and Armenia, *FEMS Microbiol. Ecol.*, 85(2), 283-292, doi: <https://doi.org/10.1111/1574-6941.12117>, 2013.
- Engel, C. E. A., Vorländer, D., Biedendieck, R., Krull, R., and Dohnt, K.: Quantification of microaerobic growth of *Geobacter sulfurreducens*, *PLoS One*, 15(1), e0215341, doi: <https://doi.org/10.1371/journal.pone.0215341>, 2020.
- Epure, L., Meleg, I. N., Munteanu, C. M., Roban, R. D., and Moldovan O.T.: Bacterial and fungal diversity of Quaternary cave sediment deposits, *Geomicrobiol. J.*, 31, 116-127, doi: <https://doi.org/10.1080/01490451.2013.815292>, 2014.
- Epure, L., Muntean, V., Constantin, S., and Moldovan, O. T.: Ecophysiological groups of bacteria from cave sediments as potential indicators of paleoclimate, *Quat. Int.*, 432, 20-32, doi: <https://doi.org/10.1016/j.quaint.2015.04.016>, 2017.
- Feng, L., Yang, J., Ma, F., Pi, S., Xing, L., and Li, A.: Characterisation of *Pseudomonas stutzeri* T13 for aerobic denitrification: Stoichiometry and reaction kinetics, *Sci. Total Environ.*, 717, 135181, doi: <https://doi.org/10.1016/j.scitotenv.2019.135181>, 2020.
- Fike, D. A., Bradley, A. S., and Rose, C. V.: Rethinking the ancient sulfur cycle, *Annu. Rev. Earth Planet. Sci.*, 43(1), 593-622, doi: <https://doi.org/10.1146/annurev-earth-060313-054802>, 2015.
- Finore, I., Feola, A., Russo, L., Cattaneo, A., Di Donato, P., Nicolaus, B., Poli, A., and Romano, I.: Thermophilic bacteria and their thermozymes in composting processes: a review, *Chem. Biol. Technol. Agric.*, 10, 7, doi: <https://doi.org/10.1186/s40538-023-00381-z>, 2023.
- Frindte, K., Lehndorff, E., Vlaminc, S., Werner, K., Kehl, M., Khormali, F., and Knief, C.: Evidence for signatures of ancient microbial life in paleosols, *Sci. Rep.*, 10, 16830, doi: <https://doi.org/10.1038/s41598-020-73938-9>, 2020.
- Gaastra, W., Kusters, J. G., Van Duijkeren, E., and Lipman, L. J. A.: *Escherichia fergusonii*, *Vet. microbiol.*, 172(1-2), 7-12, doi: <https://doi.org/10.1016/j.vetmic.2014.04.016>, 2014.
- Ghenea, C., Bandrabur, T., and Ghenea, A.: Atlas of Romania: The underground and mineral waters map; Sheet V-2; Romanian Academy, Institute of Geography, Bucharest, Romania, 1981.
- Gomez, E. J., Delgado, J. A., and González, J. M.: Influence of water availability and temperature on estimates of microbial extracellular enzyme activity, *PeerJ*, 9, e10994, doi: <https://doi.org/10.7717/peerj.10994>, 2021.
- González, J. M., Portillo, M. C., and Piñeiro-Vidal, M.: Latitude-dependent underestimation of microbial extracellular enzyme activity in soils, *Int. J. Environ. Sci. Technol.*, 12, 2427–2434, doi: <https://doi.org/10.1007/s13762-014-0635-7>, 2015.
- González, J. M., Santana, M. M., Gomez, E. J., and Delgado, J. A.: Soil thermophiles and their extracellular enzymes: a set of capabilities able to provide significant services and risks, *Microorganisms*, 11(7), 1650, doi: <https://doi.org/10.3390%2Fmicroorganisms11071650>, 2023.
- Greene, A. C., Patel, B. K., and Yacob, S.: *Geoalkalibacter subterraneus* sp. nov., an anaerobic Fe (III)-and Mn (IV)-reducing bacterium from a petroleum reservoir, and emended descriptions of the family Desulfuromonadaceae and the genus *Geoalkalibacter*, *IJSEM*, 59(4), 781-785, doi: <https://doi.org/10.1099/ij.s.0.001537-0>, 2009.

- Grégoire, P., Bohli, M., Cayol, J. L., Joseph, M., Guasco, S., Dubourg, K., Cambar, J., Michotey, V., Bonin, P., Fardeau, M. L., and Ollivier, B.: *Caldilinea tarbellica* sp. nov., a filamentous, thermophilic, anaerobic bacterium isolated from a deep hot aquifer in the Aquitaine Basin, Int. J. Syst. Evol. Microbiol., 61(Pt 6), 1436-1441, doi: <https://doi.org/10.1099/ij.s.0.025676-0>, 2011.
- 535 Haidău, C., Năstase-Bucur, R., Bulzu, P., Levei, E., Cadar, O., Mirea, I. C., Faur, L., Fruth, V., Atkinson, I., Constantin, S., and Moldovan, O. T.: A 16S rRNA gene-based metabarcoding of phosphate-rich deposits in Muierilor Cave, South-Western Carpathians. Front. Microbiol., 13, doi: <https://doi.org/10.3389/fmicb.2022.877481>, 2022.
- Hakil, F., Amin-Ali, O., Hirschler-Rea, A., Mollex, D., Grossi, V., Duran, R., Matheron, R., and Cravo-Laureau, C.: *Desulfatiferula berrensensis* sp. nov., an-alkene-degrading sulfate-reducing bacterium isolated from estuarine sediments, IJSEM, 64(Pt\_2), 540-544, doi: <https://doi.org/10.1099/ij.s.0.057174-0>, 2014.
- 540 Hann, H., Berza, T., Pop, G., Marinescu, F., Ricman, C., Pană, D., Săbău, G., Bindea, G., and Tatu, M. Harta geologică a României scara 1:50.000, Foaia Polovragi. Institutul Geologic al României, București, 1986.
- Hanson, C. A., Fuhrman, J. A., Horner-Devine, M. C., and Martiny, J. B. H.: Beyond biogeographic patterns: processes shaping the microbial landscape, Nat. Rev. Microbiol., 10, 497–506, doi: <https://doi.org/10.1038/nrmicro2795>, 2012.
- 545 Haouari, O., Fardeau, M. L., Cayol, J. L., Fauque, G., Casiot, C., Elbaz-Poulichet, F., Hamdi, M., and Ollivier, B.: *Thermodesulfovibrio hydrogeniphilus* sp. nov., a new thermophilic sulphate-reducing bacterium isolated from a Tunisian hot spring. Syst. Appl. Microbiol., 31(1), 38-42, doi: <https://doi.org/10.1016/j.syapm.2007.12.002>, 2008.
- Hashmi, I., Bindschedler, S., and Junier, P.: *Firmicutes*, in: Beneficial microbes in agro-ecology, edited by: Amaresan, N., Senthil Kumar, M., Annapurna, K. Kumar Krishna, Sankaranarayanan, A., Academic Press, London, 363-396, doi: <https://doi.org/10.1016/B978-0-12-823414-3.00018-6>, 2020.
- 550 Hazarika, S. N., and Thakur, D.: *Actinobacteria*, in Beneficial microbes in agro-ecology, edited by: Amaresan, N., Senthil Kumar, M., Annapurna, K. Kumar Krishna, Sankaranarayanan, A., Academic Press, London, 443-476. doi: <https://doi.org/10.1016/B978-0-12-823414-3.00021-6>, 2020.
- Henstra, A. M., and Stams, A. J.: Novel physiological features of *Carboxydotherrmus hydrogeniformans* and *Thermoterrabacterium ferrireducens*, Appl. Environ. Microbiol., 70(12), 7236-7240, doi: <https://doi.org/10.1128/AEM.70.12.7236-7240.2004>, 2004.
- 555 Hirayama, H., Takai, K., Inagaki, F., Nealson, K. H., and Horikoshi, K.: *Thiobacter subterraneus* gen. nov., sp. nov., an obligately chemolithoautotrophic, thermophilic, sulfur-oxidizing bacterium from a subsurface hot aquifer, IJSEM, 55(1), 467-472, doi: <https://doi.org/10.1099/ij.s.0.63389-0>, 2005.
- 560 Holmer, M., and Storkholm, P.: Sulphate reduction and sulphur cycling in lake sediments: a review, Freshw. Biol., 46(4), 431-451, doi: <https://doi.org/10.1046/j.1365-2427.2001.00687.x>, 2001.
- Hosomi, K., Saito, M., Park, J., Murakami, H., Shibata, N., Ando, M., Nagatake, T., Konishi, K., Ohno, H., Tanisawa, K., Mohsen, A., Chen, Y-A., Kawashima, J., Natsume-Kitatani, Y., Oka, Y., Shimizu, H., Furuta, M., Tojima, Y., Sawane, K., Saija, A., Kondo, S., Yonejima, Y., Takeyama, H., Matsutani, A., Mizuguchi, K., Miyachi, M., and Kunisawa, J.: Oral

- 565 administration of *Blautia wexlerae* ameliorates obesity and type 2 diabetes via metabolic remodeling of the gut microbiota, Nat. Commun., 13(1), 4477, doi: <https://doi.org/10.1038/s41467-022-32015-7>, 2022.
- Howarth, G. F., and Moldovan, T. O.: The ecological classification of cave animals and their adaptations, in Cave Ecology, edited by Moldovan, T. O., Kovac, L., Halse, S., Springer, Berlin, 41–67, doi: [https://doi.org/10.1007/978-3-319-98852-8\\_4](https://doi.org/10.1007/978-3-319-98852-8_4), 2018.
- 570 Huber, K. J., Geppert, A. M., Wanner, G., Fösel, B. U., Wüst, P. K., and Overmann, J.: The first representative of the globally widespread subdivision 6 *Acidobacteria*, *Vicinamibacter silvestris* gen. nov., sp. nov., isolated from subtropical savannah soil, IJSEM, 66(8), 2971-2979, doi: <https://doi.org/10.1099/ijsem.0.001131>, 2016.
- Hubert, C., Loy, A., Nickel, M., Arnosti, C., Baranyi, C., Brüchert, V., Ferdelman, T., Finster, K., Christensen, M. F., de Rezende, R. J., Vandieken, V., and Jørgensen, B. B.: A constant flux of diverse thermophilic bacteria into the cold Arctic seabed, J. Sci., 325(5947), 1541-1544, doi: <https://doi.org/10.1126/science.1174012>, 2009.
- 575 Itoh, T., Yamanoi, K., Kudo, T., Ohkuma, M., and Takashina, T.: *Aciditerrimonas ferrireducens* gen. nov., sp. nov., an iron-reducing thermoacidophilic actinobacterium isolated from a solfataric field, IJSEM, 61(6), 1281-1285, doi: <https://doi.org/10.1099/ijs.0.023044-0>, 2011.
- Ji, M., Kong, W., Stegen, J., Yue, L., Wang, F., Dong, X., Cowan, A. D., and Ferrari, B. C.: Distinct assembly mechanisms underlie similar biogeographical patterns of rare and abundant bacteria in Tibetan Plateau grassland soils, Environ. Microbiol., 22(6), 2261-227, doi: <https://doi.org/10.1111/1462-2920.14993>, 2020.
- 580 Jia, B., Chang, X., Fu, Y., Heng, W., Ye, Z., Liu, P., Liu, L., Shoffe, A. Y., Watkins, B. C., and Zhu, L.: Metagenomic analysis of rhizosphere microbiome provides insights into occurrence of iron deficiency chlorosis in field of Asian pears, BMC Microbiol., 22, 18, doi: <https://doi.org/10.1186/s12866-021-02432-7>, 2022.
- 585 Kaksonen, A. H., Spring, S., Schumann, P., Kroppenstedt, R. M., and Puhakka, J. A.: *Desulfoviregula thermocuniculi* gen. nov., sp. nov., a thermophilic sulfate-reducer isolated from a geothermal underground mine in Japan, IJSEM, 57(1), 98-102, doi: <https://doi.org/10.1099/ijs.0.64655-0>, 2007.
- Kim, B. R., Shin, J., Guevarra, R. B., Lee, J. H., Kim, D. W., Seol, K. H., Lee, J-H, Kim, B. H., and Isaacson, E. R.: Deciphering diversity indices for a better understanding of microbial communities, J. Microbiol. Biotechnol, 27(12), 2089-2093, doi: <https://doi.org/10.4014/jmb.1709.09027>, 2018.
- 590 Kim, H., Park, H-Y., Yang, E. J., Kim, S-H., Kim, S-C., Oh, E-J., Moon, J., Cho, W., Shin, W., and Yu, C.: Analysis of major bacteria and diversity of surface soil to discover biomarkers related to soil health, Toxics, 10, 3:117, doi: <https://doi.org/10.3390/toxics10030117>, 2022.
- Koblížek, M., Dachev, M., Bina, D., Piwosz, K., and Kaftan, D.: Utilization of light energy in phototrophic *Gemmatimonadetes*, J. Photochem. Photobiol. B., 213, 112085, doi: <https://doi.org/10.1016/j.jphotobiol.2020.112085>, 2022.
- 595 Kochetkova, T.V., Podosokorskaya, O.A., Elcheninov, A.G., and Kublanov, I. V.: Diversity of thermophilic prokaryotes inhabiting Russian natural hot springs, Microbiology, 91, 1–27, doi: <https://doi.org/10.1134/S0026261722010064>, 2022.



- Konopiński, M. K.: Shannon diversity index: a call to replace the original Shannon's formula with unbiased estimator in the population genetics studies, *PeerJ.*, 8, e9391, doi: <https://doi.org/10.7717/peerj.9391>, 2020.
- 600 Kosznik-Kwaśnicka, K., Golec, P., Jaroszewicz, W., Lubomska, D., Piechowicz, L.: Into the Unknown: Microbial Communities in Caves, Their Role, and Potential Use, *Microorganisms*, 10, 2, 222, doi: <https://doi.org/10.3390/microorganisms10020222>, 2022.
- Krishna, M. P., and Mohan, M.: Litter decomposition in forest ecosystems: a review, *Energy, Ecol. Environ.*, 2, 236-249, doi: <https://doi.org/10.1007/s40974-017-0064-9>, 2017.
- 605 Lange-Enyedi, N. T., Németh, P., Borsodi, A. K., Halmy, R., Czuppon, G., Kovács, I., Leél-Össy, S., Demény, A., and Makk, J.: Calcium carbonate precipitating cultivable bacteria from different speleothems of karst caves, *Geomicrobiol. J.*, 39(2), 107-122, doi: <https://doi.org/10.1080/01490451.2021.2019857>, 2022.
- Leonova, G.A., Maltsev, A.E., Melenevsky, V.N., Krivonogov, S.K., Kondratyeva, L.M., Bobrov, V.A., and Suslova, M.Y.: Diagenetic transformation of organic matter in sapropel sediments of small lakes (southern West Siberia and eastern Transbaikalia), *Quat. Int.*, 524, 40–47, doi: <https://doi.org/10.1016/j.quaint.2019.03.011>, 2019.
- 610 Li, W., Fu, L., Niu, B., Wu, S., and Wooley, J.: Ultrafast clustering algorithms for metagenomic sequence analysis, *Brief. Bioinform.*, 13(6), 656-68, doi: <https://doi.org/10.1093/bib/bbs035>, 2012.
- Losey, N. A., Stevenson, B. S., Busse, H. J., Damsté, J. S. S., Rijpstra, W. I. C., Rudd, S., and Lawson, P. A.: *Thermoanaerobaculum aquaticum* gen. nov., sp. nov., the first cultivated member of Acidobacteria subdivision 23, isolated from a hot spring, *Int. J. Syst. Evol. Microbiol.*, 63(Pt 11), 4149-4157, doi: <https://doi.org/10.1099/ijs.0.051425-0>, 2013.
- 615 Lupu, S., and Ilie, I.: Observații geomorfologice preliminare în bazinul râului Galbenul. *Probleme de Geografie*, X, 1962.
- Ma, L., Huang, X., Wang, H., Yun, Y., Cheng, X., Liu, D., Lu, X., and Qiu, X.: Microbial interactions drive distinct taxonomic and potential metabolic responses to habitats in karst cave ecosystem, *Microbiol. Spectr.*, 9, e01152-21, doi: <https://doi.org/10.1128/Spectrum.01152-21>, 2021.
- 620 Ma, L., Yang, W., Huang, S., Liu, R., Li, H., Huang, X., Liu, R., Li, H., Huang, X., Xiong, J., and Liu, X.: Integrative assessments on molecular taxonomy of *Acidiferrobacter thiooxydans* ZJ and its environmental adaptation based on mobile genetic elements, *Front. Microbiol.*, 13, 826829, doi: <https://doi.org/10.3389/fmicb.2022.826829>, 2022.
- Magoč, T., and Salzberg, S. L.: FLASH: fast length adjustment of short reads to improve genome assemblies, *Bioinformatics*, 27(21), 2957-2963, doi: <https://doi.org/10.1093/bioinformatics/btr507>, 2011.
- 625 Malard, L. A., Anwar, M. Z., Jacobsen, C. S., and Pearce, D. A.: Biogeographical patterns in soil bacterial communities across the Arctic region, *FEMS Microbiol. Ecol.*, 95(9), fiz128, doi: <https://doi.org/10.1093/femsec/fiz128>, 2019.
- McMahon, S., Anderson, R.P., Saupe, E.E., and Briggs, D.E.G.: Experimental evidence that clay inhibits bacterial decomposers: Implications for preservation of organic fossils, *Geology*. 44(10), 867–870, doi: <https://doi.org/10.1130/G38454.1>, 2016.
- 630 **McMurdie, P.J., Holmes, S.: phyloseq: an R package for reproducible interactive analysis and graphics of microbiome census data. *PLOS One* 8(4):e61217. doi: <https://doi.org/10.1371/journal.pone.0061217>, 2013.**

- Michail, G., Lefkothea K., Panagiotis, M., Angeliki, R., and Ioannis, V.: Metataxonomic analysis of bacteria entrapped in a stalactite's core and their possible environmental origins, *Microorganisms*, 9, 12: 2411, doi: <https://doi.org/10.3390/microorganisms9122411>, 2021.
- 635 Micu, M. D., Dumitrascu, A., Cheval, S., and Birsan, V.-M.: Regional Climatic Patterns in Climate of the Romanian Carpathians, edited by: Micu, M. D., Dumitrascu, A., Cheval, S., Birsan V.-M., Springer Cham, Switzerland, 73-148, doi: <https://doi.org/10.1007/978-3-319-02886-6>, 2015.
- Milojevic, T., Cramm, M. A., Hubert, C. R. J., and Westall, F.: "Freezing" thermophiles: From one temperature extreme to another, *Microorganisms*, 10, 2417, doi: <https://doi.org/10.3390/microorganisms10122417>, 2022.
- 640 Minckley, T. A., Clementz, M. T., and Lovelace, D.: Paleo-vegetation and environmental history of Natural Trap Cave based on pollen and carbon isotope analyses, *Quat. Int.*, 647, 103-111, doi: <https://doi.org/10.1016/j.quaint.2021.11.019>, 2023.
- Mirea, I. C.: Late Quaternary environmental changes as revealed by the sedimentary archives from Muierilor Cave, Romania. Unpublished PhD thesis, Cluj-Napoca, 138, 2020.
- Mirea, I. C., Robu, M., Petculescu, A., Kenesz, M., Faur, L., Arghir, R., Tecsa, V., Timar-Gabor, A., Roban, R-D., Panaiotu, G. C., Sharifi, A., Pourmand, A., Codrea, A. V., and Constantin, S.: Last deglaciation flooding events in the Southern Carpathians as revealed by the study of cave deposits from Muierilor Cave. Romania. *Palaeogeography Palaeoclimatol. Palaeoecol.* 562, 110084, doi: <https://doi.org/10.1016/j.palaeo.2020.110084>, 2021.
- Miroshnichenko, M.L., and Bonch-Osmolovskaya, E.A.: Recent developments in the thermophilic microbiology of deep-sea hydrothermal vents, *Extremophiles* 10, 85–96, doi: <https://doi.org/10.1007/s00792-005-0489-5>, 2006.
- 650 Misra, P. K., Gautam, N. K., and Elangovan, V.: Bat guano: a rich source of macro and microelements essential for plant growth, *Ann. Plant Soil Res.*, 21, 82–86, 2019.
- Moldovan, O.T., Constantin, S., Panaiotu, C., Roban, R.D., Frenzel, P., and Miko, L.: Fossil invertebrates records in cave sediments and paleoenvironmental assessments: a study of four cave sites from Romanian Carpathians, *Biogeosciences*, 13, 483-497, doi: <https://doi.org/10.5194/bg-13-483-2016>, 2016.
- 655 Moldovan, O.T., Mihevc, A., Miko, L., Constantin, S., Meleg, I. N., Petculescu, A., and Bosak, P.: Invertebrate fossils from cave sediments: a new proxy for pre-Quaternary paleoenvironments, *Biogeosciences*, 8, 1825-1837, doi: <https://doi.org/10.5194/bg-8-1825-2011>, 2011.
- More, K. D., Giosan, L., Grice, and Coolen, M. J.: Holocene paleodepositional changes reflected in the sedimentary microbiome of the Black Sea, *Geobiology*, 17(4), 436-448, doi: <https://doi.org/10.1111/gbi.12338>, 2019.
- 660 Moreno, I. J., Brahamsha, B., Donia, M. S., and Palenik, B.: Diverse microbial hot spring mat communities at Black Canyon of the Colorado River, *Microb. Ecol.*, 86, 1534–1551, doi: <https://doi.org/10.1007/s00248-023-02186-x>, 2023.
- Mori, K., Hanada, S., Maruyama, A., and Marumo, K.: *Thermanaeromonas toyohensis* gen. nov., sp. nov., a novel thermophilic anaerobe isolated from a subterranean vein in the Toyoha Mines, *IJSEM*, 52(5), 1675-1680, doi: <https://doi.org/10.1099/00207713-52-5-1675>, 2002.

- 665 Mori, K., Suzuki, K. I., Urabe, T., Sugihara, M., Tanaka, K., Hamada, M., and Hanada, S.: *Thiopropfundum hispidum* sp. nov., an obligately chemolithoautotrophic sulfur-oxidizing gammaproteobacterium isolated from the hydrothermal field on Suiyo Seamount, and proposal of Thioalkalispiraceae fam. nov. in the order Chromatiales, IJSEM, 61(10), 2412-2418, doi: <https://doi.org/10.1099/ijms.0.026963-0>, 2011.
- Müller, A. L., De Rezende, J. R., Hubert, C. R., Kjeldsen, K. U., Lagkouvardos, I., Berry, D., Jørgensen, B. B., and Loy, A.:  
670 Endospores of thermophilic bacteria as tracers of microbial dispersal by ocean currents, ISME J., 8(6), 1153-1165, doi: <https://doi.org/10.1038/ismej.2013.225>, 2014.
- Nejman, L., Lisá, L., Doláková, N., Horáček, I., Bajer, A., Novák, J., Wright, D., Sullivan, M., Wood, R., Gargett, R. H., Pacher, M., Sázelová, S., Nývltová Fišáková, M., Rohovec, J., and Králík, M.: Cave deposits as a sedimentary trap for the Marine Isotope Stage 3 environmental record: The case study of Pod Hradem, Czech Republic, Palaeogeogr. Palaeoclimatol.  
675 Palaeoecol., 497, 201-217, doi: <https://doi.org/10.1016/j.palaeo.2018.02.020>, 2018.
- North Greenland Ice Core Project members: High-resolution record of Northern Hemisphere climate extending into the last interglacial period, Nature, 431, 147-151, doi: <https://doi.org/10.1038/nature02805>, 2004.
- Novikov, A. A., Sokolova, T. G., Lebedinsky, A. V., Kolganova, T. V., and Bonch-Osmolovskaya, E. A.: *Carboxydotherrmus islandicus* sp. nov., a thermophilic, hydrogenogenic, carboxydophilic bacterium isolated from a hot spring, IJSEM, 61(10),  
680 2532-2537, doi: <https://doi.org/10.1099/ijms.0.030288-0>, 2011.
- Onac, B. P., Wynn, J. G., and Sumrall, J. B.: Tracing the sources of cave sulfates: a unique case from Cerna Valley, Romania, Chem. Geol., 288(3-4), 105-114, doi: <https://doi.org/10.1016/j.chemgeo.2011.07.006>, 2011.
- Osipova, E., Danukalova, G., and Tiunov, M.: Late Pleistocene and Holocene malacological and theriological faunas from the Tetyukhinskaya Cave (South Far East, Russia) and their palaeoecological implications, Palaeoworld, doi:  
685 <https://doi.org/10.1016/j.palwor.2022.12.007>, 2002.
- Pascual, J., Foessel, B. U., Geppert, A., Huber, K. J., Boedeker, C., Luckner, M., Wanner, G., and Overmann, J.: *Roseisolibacter agri* gen. nov., sp. nov., a novel slow-growing member of the under-represented phylum Gemmatimonadetes, IJSEM, 68(4), 1028-1036, doi: <https://doi.org/10.1099/ijsem.0.002619>, 2018.
- Perevalova, A. A., Kublanov, I. V., Baslerov, R. V., Zhang, G., and Bonch-Osmolovskaya, E. A. *Brockia lithotrophica* gen.  
690 nov., sp. nov., an anaerobic thermophilic bacterium from a terrestrial hot spring, Int. J. Syst. Evol. Microbiol., 63(Pt 2), 479-483, doi: <https://doi.org/10.1099/ijms.0.041285-0>, 2013.
- Perfumo, A., and Marchant, R.: Global transport of thermophilic bacteria in atmospheric dust, Environ. Microbiol. Reports, 2(2), 333-339, doi: <https://doi.org/10.1111/j.1758-2229.2010.00143.x>, 2010.
- Pester, M., Knorr, K. H., Friedrich, M. W., Wagner, M., and Loy, A.: Sulfate-reducing microorganisms in wetlands—fameless  
695 actors in carbon cycling and climate change, Front. Microbiol., 3, 72, doi: <https://doi.org/10.3389/fmicb.2012.00072>, 2012.
- Pianta, A., Arvikar, S., Strle, K., Drouin, E. E., Wang, Q., Costello, C. E., and Steere, A. C. Evidence of the immune relevance of *Prevotella copri*, a gut microbe, in patients with rheumatoid arthritis, Arthritis & Rheumatology, 69(5), 964-975, doi: <https://doi.org/10.1002/art.40003>, 2017.

- Portillo, M. C., and González, J. M.: Microbial communities and immigration in volcanic environments of Canary Islands (Spain), *Naturwissenschaften.*, 95, 307-315, doi: <https://doi.org/10.1007/s00114-007-0330-3>, 2008.
- Portillo, M. C., Santana, M., and González, J. M.: Presence and potential role of thermophilic bacteria in temperate terrestrial environments, *Naturwissenschaften*, 99(1), 43-53, doi: <https://doi.org/10.1007/s00114-011-0867-z>, 2012.
- Prescott, C. E., and Vesterdal, L.: Decomposition and transformations along the continuum from litter to soil organic matter in forest soils, *For. Ecol. Manag.*, 498, 119522, doi: <https://doi.org/10.1016/j.foreco.2021.119522>, 2021.
- Prieto, A. R., Azar, P. F., and Fernández, M. M.: Holocene vegetation dynamics and human–environment interactions inferred from pollen and plant macrofossils from caves in northwestern Patagonia (Argentina), *Rev. of Palaeobot. Palynol.*, 293, 104496, doi: <https://doi.org/10.1016/j.revpalbo.2021.104496>, 2021.
- Reang, L., Bhatt, S., Tomar, R. S., Joshi, K., Padhiyar, S., Vyas, M. U., and Kheni, H. J.: Plant growth promoting characteristics of halophilic and halotolerant bacteria isolated from coastal regions of Saurashtra Gujarat, *Sci. Rep.*, 12, 4699, doi: <https://doi.org/10.1038/s41598-022-08151-x>, 2022.
- Rime, T., Hartmann, M., and Frey, B.: Potential sources of microbial colonizers in an initial soil ecosystem after retreat of an alpine glacier, *ISME J.*, 10(7), 1625-1641, doi: <https://doi.org/10.1038/ismej.2015.238>, 2016.
- Romanenko, L.A., Tanaka, N., Svetashev, V.I., and Mikhailov, V. V.: *Pseudomonas glareae* sp. nov., a marine sediment-derived bacterium with antagonistic activity, *Arch. Microbiol.*, 197, 693–699, doi: [https://doi.org/10.1007/s00203-015-1103-](https://doi.org/10.1007/s00203-015-1103-6)
- 6, 2015.
- Romano, E., Sechi, D., Andreucci, S., Bergamin, L., D'Ambrosi, A., De Santis, C., Di Bella, L., Dinelli, E., Frezza, V., Pascucci, V., Pierfranceschi, G., and Provenzani, C.: Paleocological reconstruction during the Holocene in the Middle Branch of Bue Marino Cave (Sardinia, Italy), *The Holocene*, 34(1), 74-86, doi: <https://doi.org/10.1177/09596836231200435>, 2024.
- Sakon, H., Nagai, F., Morotomi, M., and Tanaka, R.: *Sutterella parvirubra* sp. nov. and *Megamonas funiformis* sp. nov., isolated from human faeces, *IJSEM*, 58(4), 970-975, doi: <https://doi.org/10.1099/ijms.0.65456-0>, 2008.
- Santana, M. M., Carvalho, L., Melo, J., Araújo, M. E., and Cruz, C.: Unveiling the hidden interaction between thermophiles and plant crops: Wheat and soil thermophilic bacteria, *J. Plant Interact.*, 15, 127–138, doi: <https://doi.org/10.1080/17429145.2020.1766585>, 2020.
- Santana, M. M., Dias, T., González, J. M., and Cruz, C.: Transformation of organic and inorganic sulfur-adding perspectives to new players in soil and rhizosphere, *Soil Biol. Biochem.*, 160, 108306, doi: <https://doi.org/10.1016/j.soilbio.2021.108306>, 2021.
- Santana, M. M., and González, J. M.: High temperature microbial activity in upper soil layers, *FEMS Microbiol. Lett.*, 362(22), fnv182, doi: <https://doi.org/10.1093/femsle/fnv182>, 2015.
- Schloss, P. D., Westcott, S. L., Ryabin, T., Hall, J. R., Hartmann, M., Hollister, E. B., Lesniewski, A. R., Oakley, B. B., Parks, H. D., Robinson, J. C., Sahl, W. J., Stres, B., Thallinger, G. G., Van Horn, J. D., and Weber, C. F.: Introducing Mothur: open-

- source, platform-independent, community-supported software for describing and comparing microbial communities, Appl. Environ. Microbiol., 75(23), 7537-7541, doi: <https://doi.org/10.1128/AEM.01541-09>, 2009.
- Semenov, M. V., Chernov, T. I., Zhelezova, A. D., Nikitin, D. A., Tkhakhova, A. K., Ivanova, E. A., Xenofontova, N. A., Sycheva, S. A., Kolganova, T. V., and Kutovaya, O. V.: Microbial communities of interglacial and interstadial paleosols of the Late Pleistocene, Eurasian Soil Sc., 53, 772–779, doi: <https://doi.org/10.1134/S1064229320060101>, 2020.
- Shelobolina, E. S., Nevin, K. P., Blakeney-Hayward, J. D., Johnsen, C. V., Plaia, T. W., Krader, P., Woodard, T., Holmes, D. E., VanPraagh, C. G., and Lovley, D. R.: *Geobacter pickeringii* sp. nov., *Geobacter argillaceus* sp. nov. and *Pelosinus fermentans* gen. nov., sp. nov., isolated from subsurface kaolin lenses, IJSEM, 57(1), 126-135, doi: <https://doi.org/10.1099/ijs.0.64221-0>, 2007.
- Simpson, E. H.: Measurement of diversity, Nature. 163, 4148, 688, 1949.
- Slobodkin, A. I., Reysenbach, A. L., Slobodkina, G. B., Baslerov, R. V., Kostrikin, N. A., Wagner, I. D., and Bonch-Osmolovskaya, E. A.: *Thermosulfurimonas dismutans* gen. nov., sp. nov., an extremely thermophilic sulfur-disproportionating bacterium from a deep-sea hydrothermal vent, IJSEM, 62(Pt\_11), 2565-2571, doi: <https://doi.org/10.1099/ijs.0.034397-0>, 2012.
- Slobodkina, G. B., Baslerov, R. V., Novikov, A. A., Bonch-Osmolovskaya, E. A., and Slobodkin, A. I.: *Thermodesulfurimonas autotrophica* gen. nov., sp. nov., a thermophilic, obligate sulfite-reducing bacterium isolated from a terrestrial hot spring, IJSEM, 67(2), 301-305, doi: <https://doi.org/10.1099/ijsem.0.001619>, 2017.
- Sokolova, T. G., Kostrikin, N. A., Chernyh, N. A., Kolganova, T. V., Tourova, T. P., and Bonch-Osmolovskaya, E. A.: *Thermincola carboxydiphila* gen. nov., sp. nov., a novel anaerobic, carboxydotrophic, hydrogenogenic bacterium from a hot spring of the Lake Baikal area, IJSEM, 55(5), 2069-2073, doi: <https://doi.org/10.1099/ijs.0.63299-0>, 2005.
- Sperfeld, M., Diekert, G., and Studenik, S.: Anaerobic aromatic compound degradation in *Sulfuritalea hydrogenivorans* sk43H, FEMS Microbiol. Ecol., 95(1), fiy199, doi: <https://doi.org/10.1093/femsec/fiy199>, 2019.
- Takahashi, H., Kopriva, S., Giordano, M., Saito, K., and Hell, R.: Sulfur assimilation in photosynthetic organisms: molecular functions and regulations of transporters and assimilatory enzymes, Annu. Rev. Plant Biol., 62, 157-184, doi: <https://doi.org/10.1146/annurev-arplant-042110-103921>, 2011.
- Talà, A., Buccolieri, A., Calcagnile, M., Ciccarese, G., Onorato, M., Onorato, R., Serra, A., Spedicato, F., Tredici, M. S., Alifano, P., and Belmonte, G.: Chemotrophic profiling of prokaryotic communities thriving on organic and mineral nutrients in a submerged coastal cave, Sci. Total Environ., 755, 142514, doi: <https://doi.org/10.1016/j.scitotenv.2020.142514>, 2021.
- Taran, O. P., Boltenev, V. V., Ermolaeva, N. I., Zarubina, E. Y., Delii, I. V., Romanov, R. E., and Strakhovenko, V. D.: Relations between the chemical composition of organic matter in lacustrine ecosystems and the genesis of their sapropel, Geochem. Int., 56, 256-265, doi: <https://doi.org/10.1134/S0016702918030096>, 2018.
- Täuber, S., Riedel, S. L., Neubauer, P., and Junne, S.: Phosphate assimilation with co-cultures of *Acinetobacter tjernbergiae* and *Pseudomonas stutzeri*. Chemie-Ingenieur-Technik, doi: <https://doi.org/10.1002/cite.202255269>, 2022.

- Tauxe, L., Gee, J., and Staudigel, H.: Flow directions in dikes from AMS data: The bootstrap way, *J. Geophys. Res.*, 103, 17,775–17,790., 1998.
- Thomas, S. P., Shanmuganathan, B., Jaiswal, M. K., Kumaresan, A., Sadasivam, S. K.: Legacy of a Pleistocene bacterial community: Patterns in community dynamics through changing ecosystems, *Microbiol. Res.*, 226, 65-73, doi: <https://doi.org/10.1016/j.micres.2019.06.001>, 2019.
- Thu, N. K., Tanabe, Y., Yoshida, M., Matsuura, H., and Watanabe, M. M.: *Aerosakkonema funiforme* gen. et sp. nov. (*Oscillatoriales*), a new gas-vacuolated oscillatoroid cyanobacterium isolated from a mesotrophic reservoir, *Phycologia*, 51(6), 672-683, doi: <https://doi.org/10.2216/11-130.1>, 2012.
- Uroz, S., Calvaruso, C., Turpault, M. P., and Frey-Klett, P.: Mineral weathering by bacteria: ecology, actors and mechanisms, *Trends Microbiol.*, 17(8), 378-387, doi: <https://doi.org/10.1016/j.tim.2009.05.004>, 2009.
- Walters, K. E., Capocchi, J. K., Albright, M. B. N. Hao, Z., Brodie, L. E., and Martiny, B. J.: Routes and rates of bacterial dispersal impact surface soil microbiome composition and functioning, *ISME J.*, 16, 2295–2304, doi: <https://doi.org/10.1038/s41396-022-01269-w>, 2022.
- Waltgenbach, S., Riechelmann, D. F. C., Spötl, C., Jochum, K. P., Fohlmeister, J., Schröder-Ritzrau, A., and Scholz, D.: Climate variability in central europe during the last 2500 years reconstructed from four high-resolution multi-proxy speleothem records, *Geosci.*, 11, 4, 166, doi: <https://doi.org/10.3390/geosciences11040166>, 2021.
- Wani, A. K., Akhtar, N., Sher, F. Navarrete, A. A., and Américo-Pinheiro, J. H. P.: Microbial adaptation to different environmental conditions: molecular perspective of evolved genetic and cellular systems, *Arch. Microbiol.*, 204, 144, doi: <https://doi.org/10.1007/s00203-022-02757-5>, 2022.
- Weber, M., Hinz, Y., Schöne, B. R., Jochum, K. P., Hoffmann, D., Spötl, C., Riechelmann, D. F. C., and Scholz, D.: Opposite trends in Holocene speleothem proxy records from two neighboring caves in Germany: A multi-proxy evaluation, *Front. Earth Sci.*, 9, 642651, doi: <https://doi.org/10.3389/feart.2021.642651>, 2021.
- White, W. B.: Cave sediments and paleoclimate, *J. Cave Karst Stud.*, 69, 1, 76-93, 2007.
- Wu, Y., Tan, L., Liu, W., Wang, B., Wang, J., Cai, Y., and Lin, X.: Profiling bacterial diversity in a limestone cave of the western Loess Plateau of China, *Front. Microbiol.*, 6, 244, doi: <https://doi.org/10.3389/fmicb.2015.00244>, 2015.
- Xu, S., Wang, J., Zhang, X., Yang, R., Zhao, W., Huang, Z., and Wang, Y.: Lacustrine sediments bacterial community structure vertical succession of the Linxia Basin, NE Tibetan Plateau: significance for paleoenvironment reconstruction, *Front. Earth Sci.*, 9, 714352, doi: <https://doi.org/10.3389/feart.2021.714352>, 2022.
- Yang, X.: *Moraxellaceae*, in: *Encyclopedia of Food Microbiology* (Second Edition), edited by: Batt, C. A., Tortorello, M. L., Academic Press, London, 826-833, doi: <https://doi.org/10.1016/B978-0-12-384730-0.00441-9>, 2014.
- Yarwood, S. A.: The role of wetland microorganisms in plant-litter decomposition and soil organic matter formation: a critical review, *FEMS Microbiol. Ecol.*, 94(11), f1y175, doi: <https://doi.org/10.1093/femsec/f1y175>, 2018.

- Yun, Y., Xiang, X., Wang, H., Man, B., Gong, L., Liu, Q., Dong, Q., and Wang, R.: Five-year monitoring of bacterial communities in dripping water from the Heshang Cave in Central China: implication for paleoclimate reconstruction and ecological functions, *Geomicrobiol. J.*, 33(7), 1-11, doi: <https://doi.org/10.1080/01490451.2015.1062062>, 2016.
- 800 Zada, S., Xie, J., Yang, M., Yang, X., Sajjad, W., Rafiq, M., Hasan, F., Zhong, H., and Wang, H.: Composition and functional profiles of microbial communities in two geochemically and mineralogically different caves, *Appl. Microbiol. Biotechnol.*, 105, 8921-8936, doi: <https://doi.org/10.1007/s00253-021-11658-4>, 2021.
- Zavarzina, D. G., Gavrilov, N. S., Chistyakova, I. N., Antonova, V. A., Gracheva, A. M., Yu Merkel, A., Perevalova, A. A., Chernov, S. M., Zhilina, N. T., Yu Bychkov, A., and Bonch-Osmolovskaya, A. E. Syntrophic growth of alkaliphilic anaerobes controlled by ferric and ferrous minerals transformation coupled to acetogenesis, *ISME J.*, 14, 2, 425-436, doi: 805 <https://doi.org/10.1038/s41396-019-0527-4>, 2020.
- Zavarzina, D. G., Zhilina, T. N., Kuznetsov, B. B., Kolganova, T. V., Osipov, G. A., Kotelev, M. S., and Zavarzin, G. A.: *Natranaerobaculum magadiense* gen. nov., sp. nov., an anaerobic, alkalithermophilic bacterium from soda lake sediment, *IJSEM*, 63, 4456-4461, doi: <https://doi.org/10.1099/ijfs.0.054536-0>, 2013.
- Zeng, X., Alain, K. and Shao, Z.: Microorganisms from deep-sea hydrothermal vents, *Mar. Life Sci. Technol.*, 3, 204-230, 810 doi: <https://doi.org/10.1007/s42995-020-00086-4>, 2021.
- Zepeda Mendoza, M. L., Lundberg, J., Ivarsson, M., Campos, P., Nylander, J. A., Sallstedt, T., and Dalen, L.: Metagenomic analysis from the interior of a speleothem in Tjuv-Ante's cave, northern Sweden, *PLoS One*, 11(3), e0151577, <https://doi.org/10.1371/journal.pone.0151577>, 2016.
- Zhang, M., Han, F., Li, Y., Liu, Z., Chen, H., Li, Z., Li, Q., and Zhou, W.: Nitrogen recovery by a halophilic ammonium- 815 assimilating microbiome: a new strategy for saline wastewater treatment, *Water Res.*, 207, 117832, doi: <https://doi.org/10.1016/j.watres.2021.117832>, 2021.
- Zhao, L., Xiao, R., Zhang, S., Zhang, C., and Zhang, F.: Environmental specificity of karst cave habitats evidenced by diverse symbiotic bacteria in Opiliones, *BMC Ecol. Evol.*, 24(1), 58, doi: <https://doi.org/10.1186/s12862-024-02248-9>, 2024.
- Zhou, J., Agichtein, E., Kallumadi, S.: Diversifying multi-aspect search results using Simpson's diversity index, *Proceedings of the 29th ACM International Conference on Information and Knowledge Management, Virtual Event Ireland, 19-23.10.2020*, 820 2345-2348, doi: <https://doi.org/10.1145/3340531.3412163>, 2020.
- Zhu, H. Z., Zhang, Z. F., Zhou, N., Jiang, C. Y., Wang, B. J., Cai, L., Wang, M-H., and Liu, S. J.: Bacteria and metabolic potential in karst caves revealed by intensive bacterial cultivation and genome assembly, *Appl. Environ. Microbiol.*, 87(6), e02440-20, doi: <https://doi.org/10.1128/AEM.02440-20>, 2021.
- 825 Zhu, H. Z., Zhang, Z. F., Zhou, N., Jiang, C. Y., Wang, B. J., Cai, L., and Liu, S. J.: Diversity, distribution and co-occurrence patterns of bacterial communities in a karst cave system, *Front. microbiol.*, 10, 1726, doi: <https://doi.org/10.3389/fmicb.2019.01726>, 2019.
